# Supplementary material
Source: publisher figshare collection journal article supplement (https://acs.figshare.com/ndownloader/files/5654418)
Supplement: Supplementary file 1 [file 5654418]

## Supporting Information:

# Elucidating the Key Role of Phosphine–Sulfonate Ligands in Palladium-Catalyzed Ethylene Polymerization: Effect of Ligand Structure on the Molecular Weight and Linearity of Polyethylene

Ryo Nakano,<sup>†</sup> Lung Wa Chung,<sup>‡</sup> Yumiko Watanabe,<sup>§</sup> Yoshishige Okuno,<sup>§</sup> Yoshikuni Okumura,<sup>||</sup>  
Shingo Ito,<sup>†</sup> Keiji Morokuma,<sup>\*,⊥</sup> and Kyoko Nozaki<sup>\*,†</sup>

<sup>†</sup> Department of Chemistry and Biotechnology, Graduate School of Engineering, The University of Tokyo, 7-3-1 Hongo, Bunkyo-ku, Tokyo 113-8656, Japan.

<sup>‡</sup> Department of Chemistry, South University of Science and Technology of China, Shenzhen 518055, China.

<sup>§</sup> Computational Science and Technology Information Center, Showa Denko K.K., 1-1-1 Ohnodai, Midori-Ku, Chiba, Chiba, 267-0056, Japan.

<sup>||</sup> Institute for Advanced and Core Technology, Showa Denko K.K., 2 Nakanosu, Oita, Oita 870-1809, Japan.

<sup>⊥</sup> Fukui Institute for Fundamental Chemistry, Kyoto University, 34-4 Takano Nishihiraki-cho, Sakyo, Kyoto 606-8103, Japan.

E-mail: nozaki@chembio.t.u-tokyo.ac.jp and morokuma.keiji.3a@kyoto-u.ac.jp

| <b>Experimental Part</b>                              | <b>page</b> |
|-------------------------------------------------------|-------------|
| <b>I. Experimental Procedures</b>                     | <b>S2</b>   |
| <b>II. NMR Spectra and SEC Charts of Polyethylene</b> | <b>S4</b>   |
| <b>III. NMR Spectra from H/D Exchange Experiments</b> | <b>S22</b>  |
| <b>IV. References</b>                                 | <b>S28</b>  |

## I. Experimental Procedures

**General:** All reactions and polymerizations were carried out using a standard glovebox or Schlenk techniques under argon purified by passing through a hot column packed with BASF catalyst R3-11. All polymerization reactions were performed in a 300-mL stainless steel autoclave.

**Instrumentation:** Nuclear magnetic resonance (NMR) spectra were recorded on a BRUKER Ascend500 ( $^1\text{H}$ : 500 MHz,  $^2\text{H}$ : 77 MHz,  $^{13}\text{C}$ : 126 MHz,  $^{31}\text{P}$ : 202 MHz) NMR spectrometer. Chemical shift values for protons are referenced to the residual proton resonance of benzene- $d_6$  ( $\delta$ : 7.16) or  $\text{CDCl}_3$  ( $\delta$ : 7.26). Chemical shift values for deuteriums are referenced to the deuterium resonance of benzene- $d$  ( $\delta$ : 7.16). Quantitative  $^{13}\text{C}$  NMR analyses of polymers were performed in a 5-mm probe on ca. 5~15 weight% solutions of the polymers and 0.05-M  $\text{Cr}(\text{acac})_3$  as a relaxation agent in 1,1,2,2-tetrachloroethane unlocked at 120 °C using a 30° pulse of 16.8  $\mu\text{s}$ , a spectral width of 30 kHz, a relaxation time of 2 s, an acquisition time of 1.1 s, and inverse-gated decoupling (BRUKER Ascend500).<sup>1,2,3</sup> Chemical shift values for carbons are referenced to the carbon resonance of 1,1,2,2-tetrachloroethane ( $\delta$ : 74.20). Size exclusion chromatography (SEC) analyses were carried out with a Tosoh instrument (HLC-8121GPC/HT) equipped with two SEC columns (Tosoh TSKgel GMHHR-H(S)HT) and a refractive index (RI) detector by eluting the columns with 1,2-dichlorobenzene at 1.0 mL/min at 145 °C. Molecular weights were determined using narrow polystyrene standards and were corrected for by universal calibration using the Mark–Houwink parameters reported by Rudin *et al.*:  $K = 1.75 \times 10^{-2} \text{ cm}^3/\text{g}$  and  $\alpha = 0.67$  for polystyrene,  $K = 5.90 \times 10^{-2} \text{ cm}^3/\text{g}$  and  $\alpha = 0.69$  for LLDPE.<sup>4</sup>

**Materials:** Ethylene (>99.9%) was purchased from Takachiho Chemical Industrial Co., Ltd. (Takachiho), and dried, deoxygenated by passing through a dry column DC-HDF300-A3 made by Nikka Seiko Co., Ltd. Anhydrous toluene were purchased from Kanto Chemical Co. Inc. (Kanto) and purified by the method of Pangborn *et al.*<sup>5</sup> Dehydrated benzene were purchased from Kanto and used as received. 2,6-lutidine and 1-eicocene were purchased from Tokyo Chemical Industry, Co., Ltd. (TCI) and distilled from calcium hydride before use. The other reagents were purchased from TCI, Kanto, or Sigma-Aldrich Chemical Co. and used as received. The following compounds were prepared according to literature procedures: [2-(*t*-Bu<sub>2</sub>P)C<sub>6</sub>H<sub>4</sub>SO<sub>3</sub>]PdMe(2,6-lutidine),<sup>6</sup> [2-(*i*-Pr<sub>2</sub>P)C<sub>6</sub>H<sub>4</sub>SO<sub>3</sub>]PdMe(2,6-lutidine),<sup>7</sup> [2-(Cy<sub>2</sub>P)C<sub>6</sub>H<sub>4</sub>SO<sub>3</sub>]PdMe(2,6-lutidine),<sup>8</sup> [2-(Men<sub>2</sub>P)C<sub>6</sub>H<sub>4</sub>SO<sub>3</sub>]PdMe(2,6-lutidine),<sup>6</sup> [2-(Ph<sub>2</sub>P)C<sub>6</sub>H<sub>4</sub>SO<sub>3</sub>]PdMe(2,6-lutidine),<sup>9</sup> [2-(bis(2-methoxyphenyl)P)C<sub>6</sub>H<sub>4</sub>SO<sub>3</sub>]PdMe(2,6-lutidine),<sup>10</sup> and [2-(*o*-Ani<sub>2</sub>P)C<sub>6</sub>H<sub>4</sub>SO<sub>3</sub>]PdH(*t*-Bu<sub>3</sub>P).<sup>11</sup>

### General Procedure of the Homopolymerization of Ethylene (Table 1)

A 300-mL autoclave charged with catalyst (0.010 mmol) and toluene (100 mL) was stirred under ethylene pressure (3.0 MPa or 1.0 MPa) at 80 °C for 1 h. After cooling to room temperature, methanol (200 mL) was added into the autoclave. The polymer was isolated by filtration, washed with methanol, and dried under vacuum. The obtained polyethylene was analyzed without further purification. The number of branches per 1000 carbons was determined by quantitative  $^{13}\text{C}$  NMR analysis using inverse-gated decoupling.

## H/D Exchange Reaction of Ethylene and MeOD using [2-(*o*-Ani<sub>2</sub>P)C<sub>6</sub>H<sub>4</sub>SO<sub>3</sub>]PdH(*t*-Bu<sub>3</sub>P)

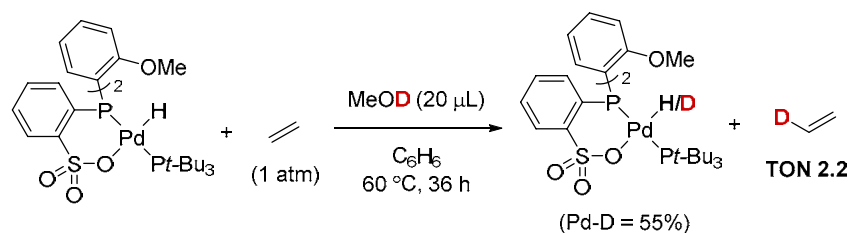

In a 5-mm J-young NMR tube (internal volume 3.0 mL), [2-(*o*-Ani<sub>2</sub>P)C<sub>6</sub>H<sub>4</sub>SO<sub>3</sub>]PdH(*t*-Bu<sub>3</sub>P) (14.2 mg, 20 μmol) and 1,4-bis(trimethylsilyl)benzene-*d*<sub>4</sub> (9.9 mg, 44 μmol, as an internal standard) in benzene (0.50 mL) and MeOD (20 μL) was cooled with liquid nitrogen bath and evacuated under high vacuum. After warming to ambient temperature, to the mixture was added atmospheric pressure of ethylene. Then, the mixture was sealed and heated at 60 °C for 36 h with using a shaking apparatus (Tosoh DF-8020). During the above experiment, not the formation of palladium black, but a slight formation of colorless precipitate was observed. After cooling to ambient temperature, the ratio of deuterium in ethylene and palladium–hydride was determined by quantitative <sup>1</sup>H and <sup>2</sup>H NMR measurements; 3.7% in ethylene, and 72% in palladium–hydride. Given that the atmospheric ethylene was also deuterated in the same ratio, the total amount of deuterated ethylene was calculated as follows; {1.1 mmol (=atmospheric ethylene) + 0.1 mmol (ethylene in benzene)} × 0.037 = 44 μmol.

## H/D Exchange Reaction of 1-Eicocene and MeOD using [2-(*o*-Ani<sub>2</sub>P)C<sub>6</sub>H<sub>4</sub>SO<sub>3</sub>]PdH(*t*-Bu<sub>3</sub>P)

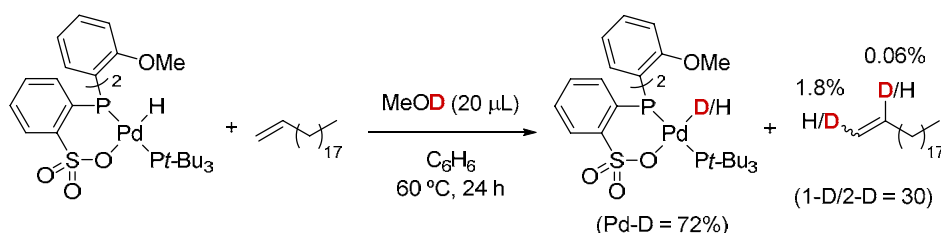

In a 5-mm J-young NMR tube, [2-(*o*-Ani<sub>2</sub>P)C<sub>6</sub>H<sub>4</sub>SO<sub>3</sub>]PdH(*t*-Bu<sub>3</sub>P) (14.2 mg, 20 μmol), 1-eicocene (56.0 mg, 0.20 mmol), and 1,4-bis(trimethylsilyl)benzene-*d*<sub>4</sub> (11.2 mg, 49.4 μmol, as an internal standard) in benzene (0.50 mL) and MeOD (20 μL) was heated at 60 °C for 24 h with using a shaking apparatus (Tosoh DF-8020). During the above experiment, the formation of palladium black was not observed, but the formation of a slight amount of colorless precipitates was observed.

After cooling to ambient temperature, the ratio of deuterium in the resulting 1-eicocene and palladium–hydride complex was determined by quantitative <sup>1</sup>H and <sup>2</sup>H NMR measurements; 1.8% in C1 position of 1-eicocene, 0.06% in C2 position of 1-eicocene, and 72% in the palladium–hydride complex. Even with ignoring natural occurrence of deuterium, the selectivity of the C1/C2 deuteration reached ca. 30.

After the reaction, most of the phosphine species observed by <sup>31</sup>P NMR analysis remained as the initial palladium–hydride or the deuterated palladium–deuteride complexes. However, the quantitative <sup>1</sup>H and <sup>2</sup>H NMR analyses suggested ca. 10% of the initial palladium–hydride complex was converted to something other than the two complexes. Judging from the formation of a slight amount of colorless precipitates observed after the reaction and the reactivity of [2-(*o*-Ani<sub>2</sub>P)C<sub>6</sub>H<sub>4</sub>SO<sub>3</sub>]PdH(*t*-Bu<sub>3</sub>P) complex reported by Mecking and coworkers, the loss of palladium/phosphine–sulfonate species can be attributed to the formation of (P<sup>+</sup>O)<sub>2</sub>Pd species which is not soluble in the reaction media.

## II. NMR Spectra and SEC Charts of Polyethylene

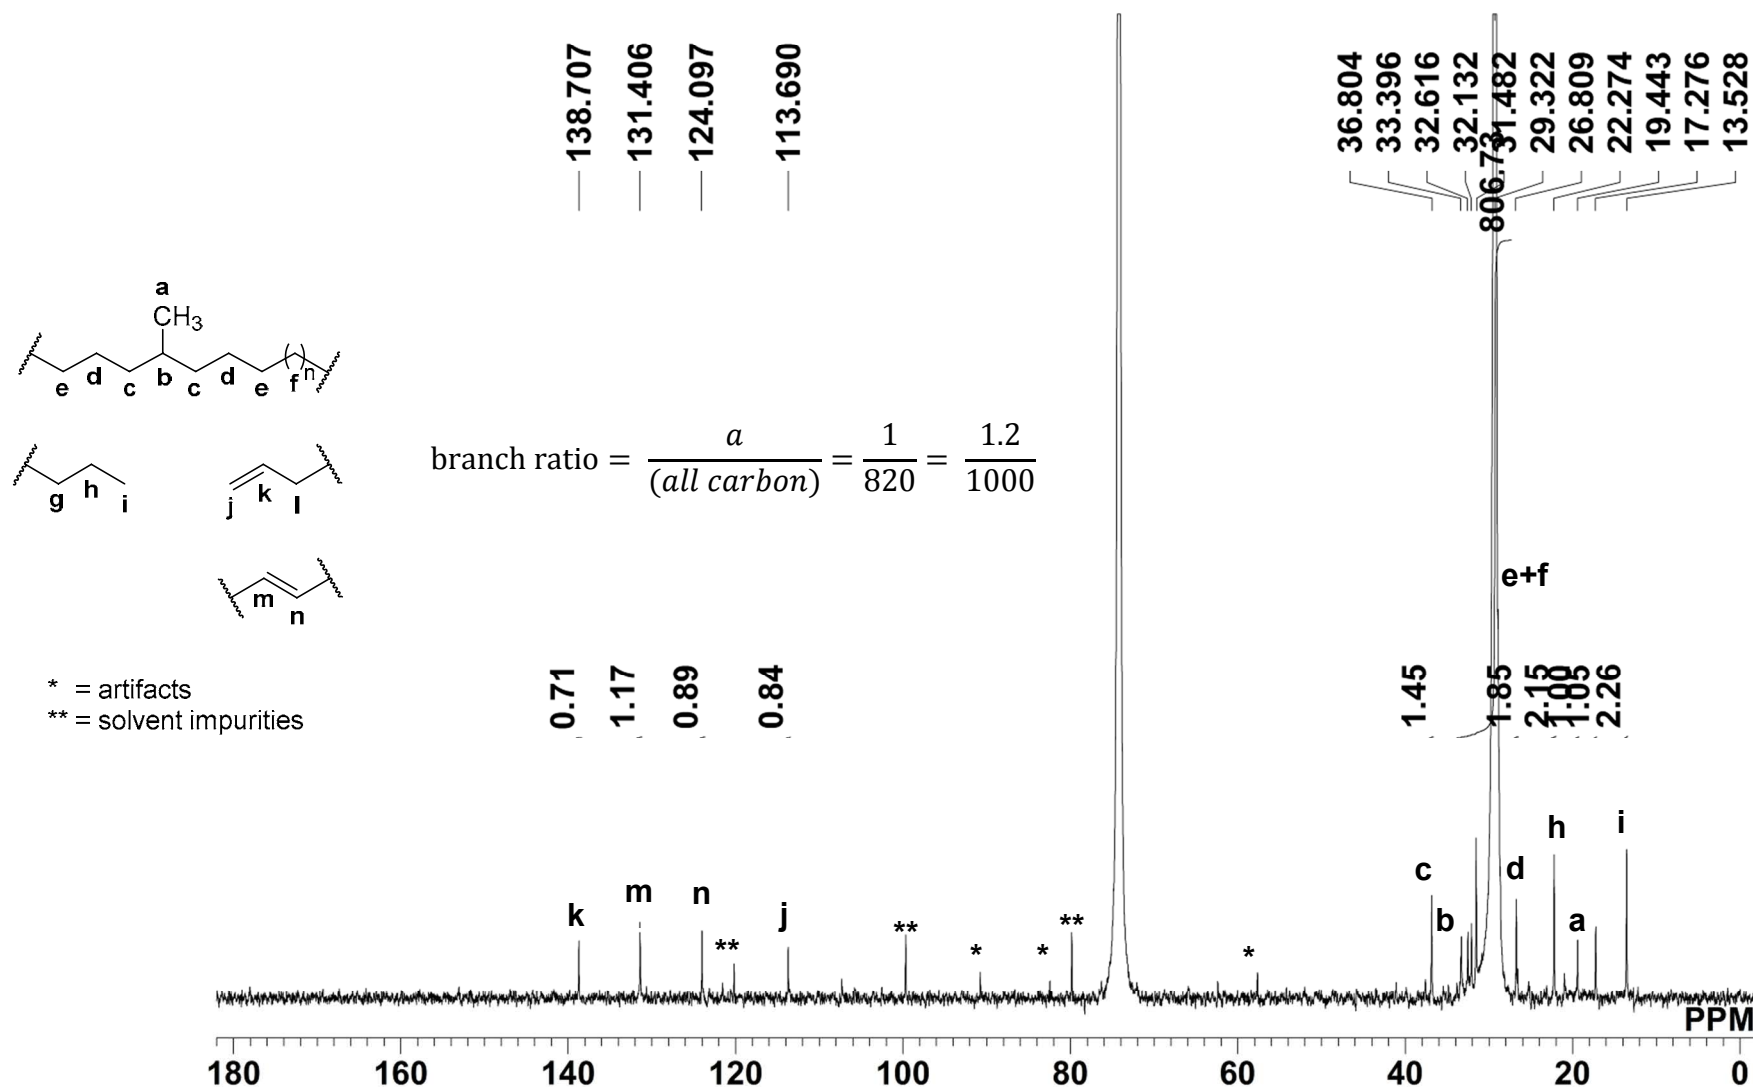

**Figure S1.** Quantitative  $^{13}\text{C}$  NMR spectrum (inverse gated decoupling, 126 MHz, 1,1,2,2-tetrachloroethane, 0.05-M Cr(acac)<sub>3</sub>, 120 °C) of polyethylene obtained by [2-(*t*-Bu<sub>2</sub>P)C<sub>6</sub>H<sub>4</sub>SO<sub>3</sub>]<sub>2</sub>PdMe(2,6-lutidine) under 1.0 MPa of ethylene pressure at 80 °C (Table 1, entry 2).

Sample name : 73-08-112  
 Database name : mike.mdb  
 Saved file name : RSLT0293  
 Method data : RSLT0291

Measurement date : 2014/06/26 03:14:14  
 Calculation date : 2014/06/26 14:16:08

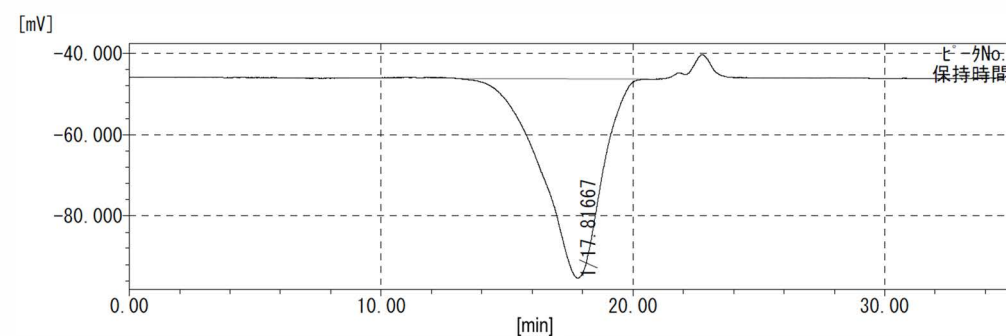

|                 | [min] | [mV]         | [MOL]     |
|-----------------|-------|--------------|-----------|
| Peak start      | 13.18 | -46.227      | 2,092.013 |
| Peak top        | 17.82 | -95.334      | 15,803    |
| Peak end        | 20.63 | -46.285      | 236       |
| Area [mV * sec] |       | 7,441.343    |           |
| Area [%]        |       | 100.000      |           |
| Height [mV]     |       | 49.071       |           |
| [ $\eta$ ]      |       | 64,541.75991 |           |

|         |   |         |
|---------|---|---------|
| Mn      | : | 10,365  |
| Mw      | : | 64,542  |
| Mz      | : | 311,417 |
| Mz+1    | : | 690,353 |
| Mv      | : | 64,542  |
| Mp      | : | 17,418  |
| Mz/Mw   | : | 4.825   |
| Mw/Mn   | : | 6.227   |
| Mz+1/Mw | : | 10.696  |

**Figure S2.** SEC chart of polyethylene obtained by  $[2-(t\text{-Bu}_2\text{P})\text{C}_6\text{H}_4\text{SO}_3]\text{PdMe}(2,6\text{-lutidine})$  under 1.0 MPa of ethylene pressure at 80 °C (Table 1, entry 2).

$M_n$  (PS) = 10,400 was corrected to  $M_n$  (PE) = 4,500 by universal calibration.

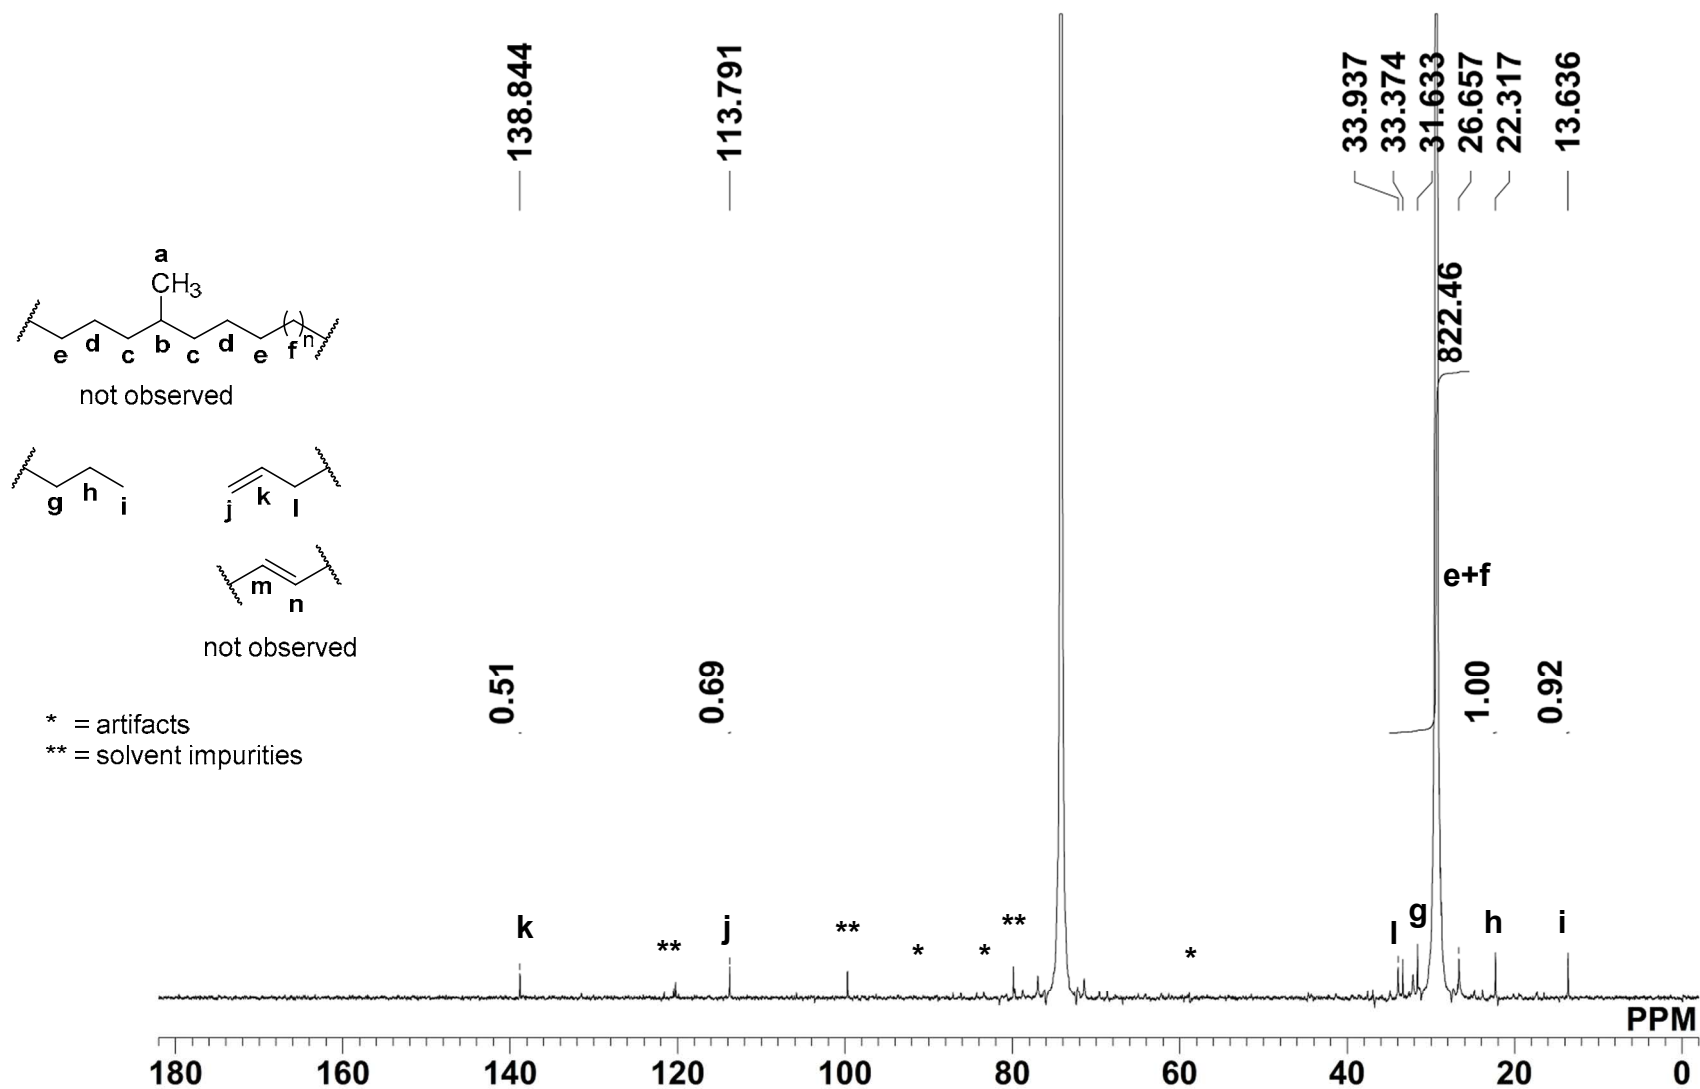

**Figure S3.** Quantitative  $^{13}\text{C}$  NMR spectrum (inverse gated decoupling, 126 MHz, 1,1,2,2-tetrachloroethane, 0.05-M  $\text{Cr}(\text{acac})_3$ , 120  $^\circ\text{C}$ ) of polyethylene obtained by  $[2-(i\text{-Pr}_2\text{P})\text{C}_6\text{H}_4\text{SO}_3]\text{PdMe}(2,6\text{-lutidine})$  under 1.0 MPa of ethylene pressure at 80  $^\circ\text{C}$  (Table 1, entry 5).

Sample name : 73-08-113  
 Database name : mike.mdb  
 Saved file name : RSLT0299  
 Method data : RSLT0291

Measurement date : 2014/07/03 18:52:50  
 Calculation date : 2014/07/03 20:55:07

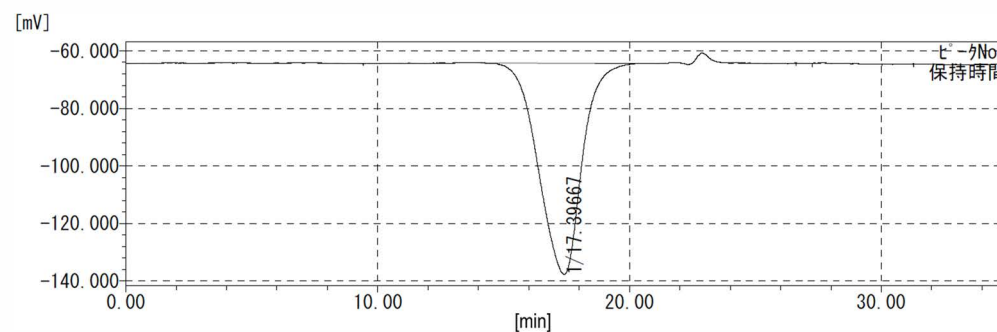

|                 | [min] | [mV]         | [MOL]     |
|-----------------|-------|--------------|-----------|
| Peak start      | 14.01 | -64.228      | 1,058,858 |
| Peak top        | 17.40 | -137.790     | 27,350    |
| Peak end        | 20.63 | -64.384      | 236       |
| Area [mV * sec] |       | 8,039.466    |           |
| Area [%]        |       | 100.000      |           |
| Height [mV]     |       | 73.482       |           |
| [η]             |       | 49,374.12828 |           |

|         |   |         |
|---------|---|---------|
| Mn      | : | 19,330  |
| Mw      | : | 49,374  |
| Mz      | : | 105,192 |
| Mz+1    | : | 196,612 |
| Mv      | : | 49,374  |
| Mp      | : | 28,909  |
| Mz/Mw   | : | 2.131   |
| Mw/Mn   | : | 2.554   |
| Mz+1/Mw | : | 3.982   |

**Figure S4.** SEC chart of polyethylene obtained by  $[2-(i\text{-Pr}_2\text{P})\text{C}_6\text{H}_4\text{SO}_3]\text{PdMe}(2,6\text{-lutidine})$  under 1.0 MPa of ethylene pressure at 80 °C (Table 1, entry 5).

$M_n$  (PS) = 8,400 was corrected to  $M_n$  (PE) = 26,000 by universal calibration.

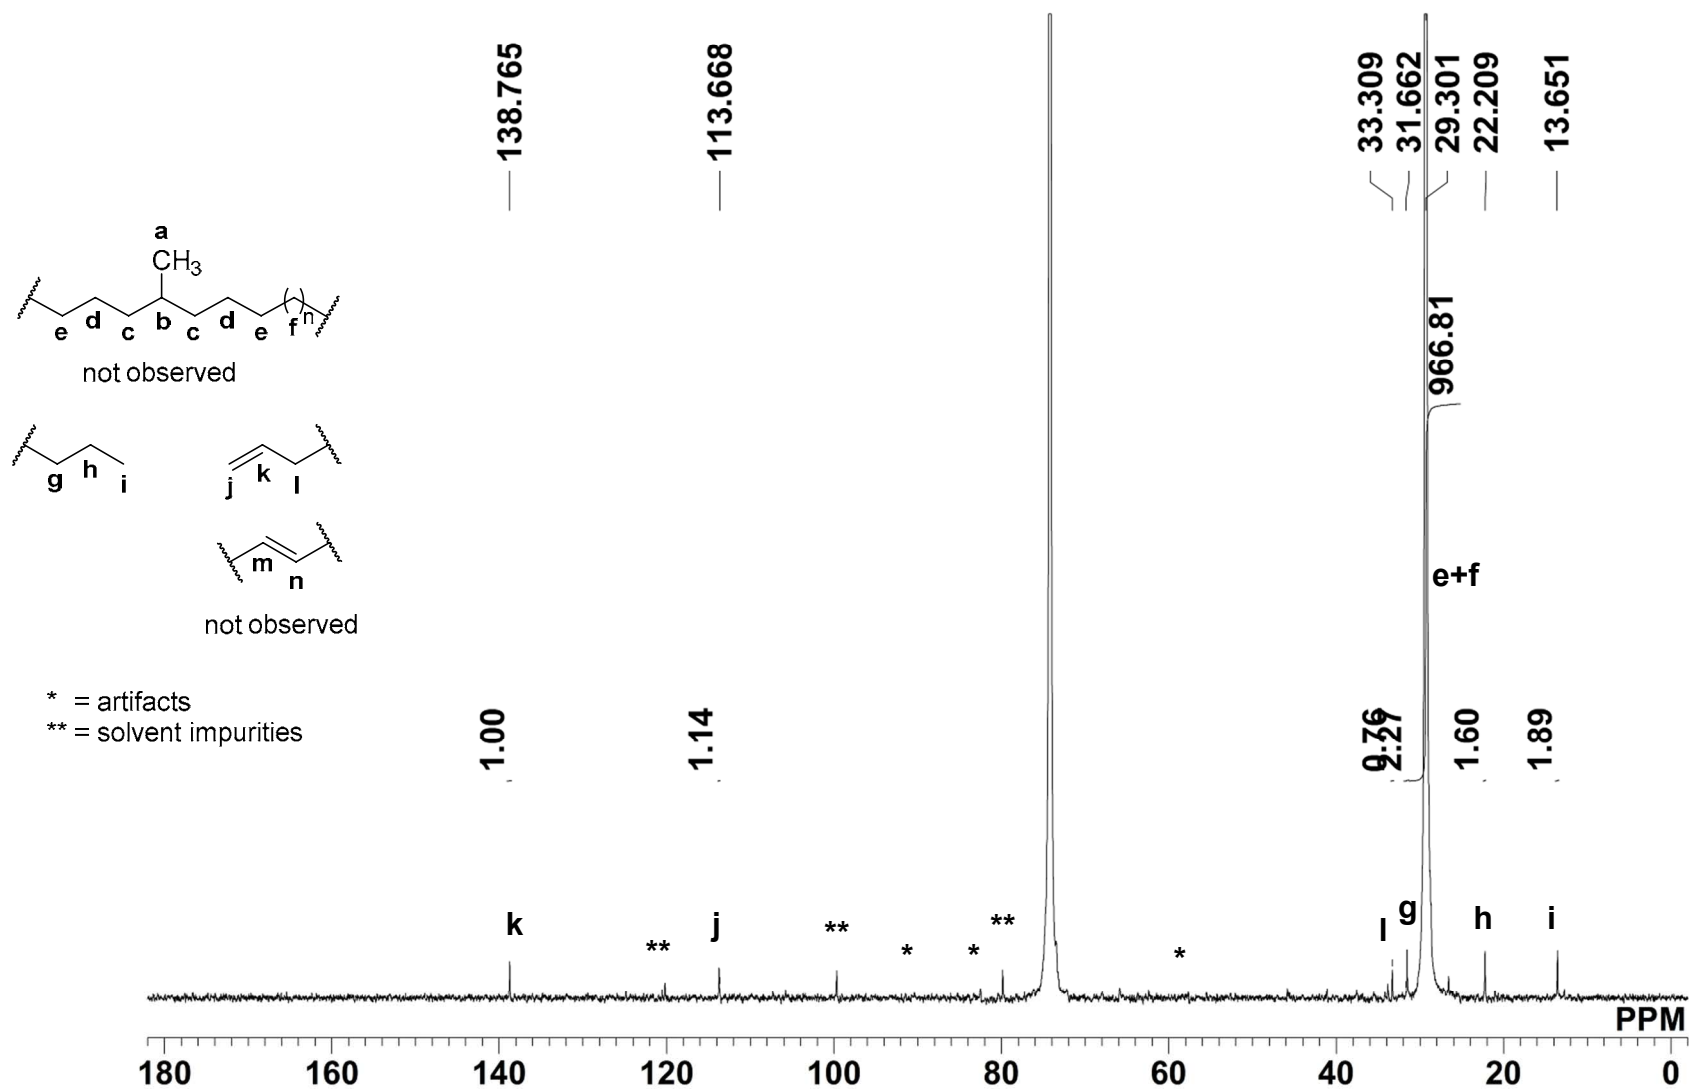

**Figure S5.** Quantitative  $^{13}\text{C}$  NMR spectrum (inverse gated decoupling, 126 MHz, 1,1,2,2-tetrachloroethane, 0.05-M  $\text{Cr}(\text{acac})_3$ , 120  $^\circ\text{C}$ ) of polyethylene obtained by  $[\text{2-(Cy}_2\text{P)C}_6\text{H}_4\text{SO}_3]\text{PdMe(2,6-lutidine)}$  under 1.0 MPa of ethylene pressure at 80  $^\circ\text{C}$  (Table 1, entry 7).



Sample name : 73-08-114  
 Database name : mike.mdb  
 Saved file name : RSLT0294  
 Method data : RSLT0291

Measurement date : 2014/06/26 03:59:18  
 Calculation date : 2014/06/26 10:08:42

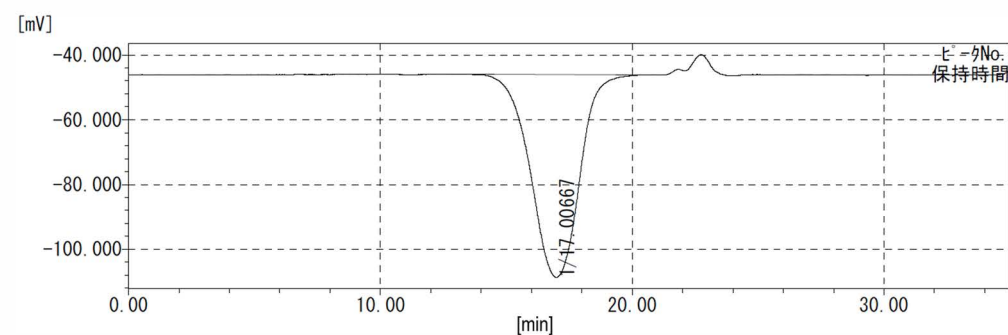

|                 | [min] | [mV]         | [MOL]     |
|-----------------|-------|--------------|-----------|
| Peak start      | 13.30 | -45.936      | 1,910,090 |
| Peak top        | 17.01 | -108.692     | 44,680    |
| Peak end        | 20.34 | -46.158      | 383       |
| Area [mV * sec] |       | 7,761.280    |           |
| Area [%]        |       | 100.000      |           |
| Height [mV]     |       | 62.639       |           |
| [ $\eta$ ]      |       | 76,909.70165 |           |

|         |   |         |
|---------|---|---------|
| Mn      | : | 27,183  |
| Mw      | : | 76,910  |
| Mz      | : | 183,563 |
| Mz+1    | : | 380,900 |
| Mv      | : | 76,910  |
| Mp      | : | 50,115  |
| Mz/Mw   | : | 2.387   |
| Mw/Mn   | : | 2.829   |
| Mz+1/Mw | : | 4.953   |

**Figure S6.** SEC chart of polyethylene obtained by  $[2-(\text{Cy}_2\text{P})\text{C}_6\text{H}_4\text{SO}_3]\text{PdMe}(2,6\text{-lutidine})$  under 1.0 MPa of ethylene pressure at 80 °C (Table 1, entry 7).

$M_n$  (PS) = 27,200 was corrected to  $M_n$  (PE) = 12,000 by universal calibration.



Sample name : 73-09-074  
 Database name : mike.mdb  
 Saved file name : RSLT0339  
 Method data : RSLT0291

Measurement date : 2014/08/06 16:51:49  
 Calculation date : 2014/08/06 20:07:30

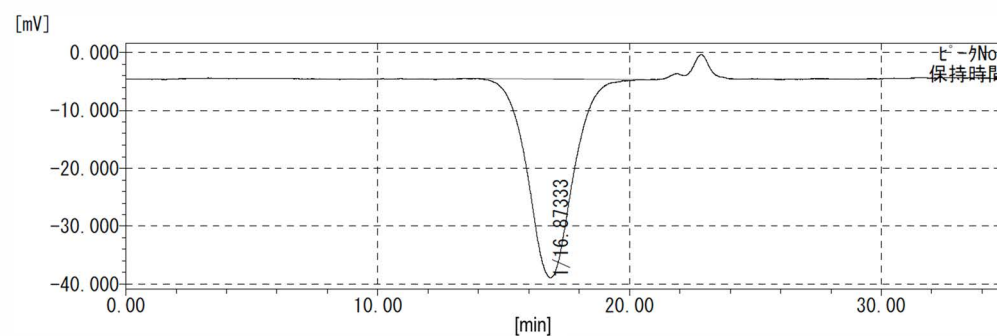

|                 | [min] | [mV]         | [MOL]     |
|-----------------|-------|--------------|-----------|
| Peak start      | 13.54 | -4.490       | 1,579,985 |
| Peak top        | 16.87 | -38.930      | 52,626    |
| Peak end        | 20.63 | -4.679       | 236       |
| Area [mV * sec] |       | 4,000.714    |           |
| Area [%]        |       | 100.000      |           |
| Height [mV]     |       | 34.351       |           |
| [ $\eta$ ]      |       | 77,845.38471 |           |

|         |   |         |
|---------|---|---------|
| Mn      | : | 27,146  |
| Mw      | : | 77,845  |
| Mz      | : | 165,946 |
| Mz+1    | : | 309,285 |
| Mv      | : | 77,845  |
| Mp      | : | 55,927  |
| Mz/Mw   | : | 2.132   |
| Mw/Mn   | : | 2.868   |
| Mz+1/Mw | : | 3.973   |

**Figure S8.** SEC chart of polyethylene obtained by  $[2-(\text{Cy}_2\text{P})\text{C}_6\text{H}_4\text{SO}_3]\text{PdMe}(2,6\text{-lutidine})$  under 3.0 MPa of ethylene pressure at 80 °C in the presence of additional 9.0 equivalent of 2,6-lutidine (Table 1, entry 9).  $M_n(\text{PS}) = 27,100$  was corrected to  $M_n(\text{PE}) = 12,000$  by universal calibration.

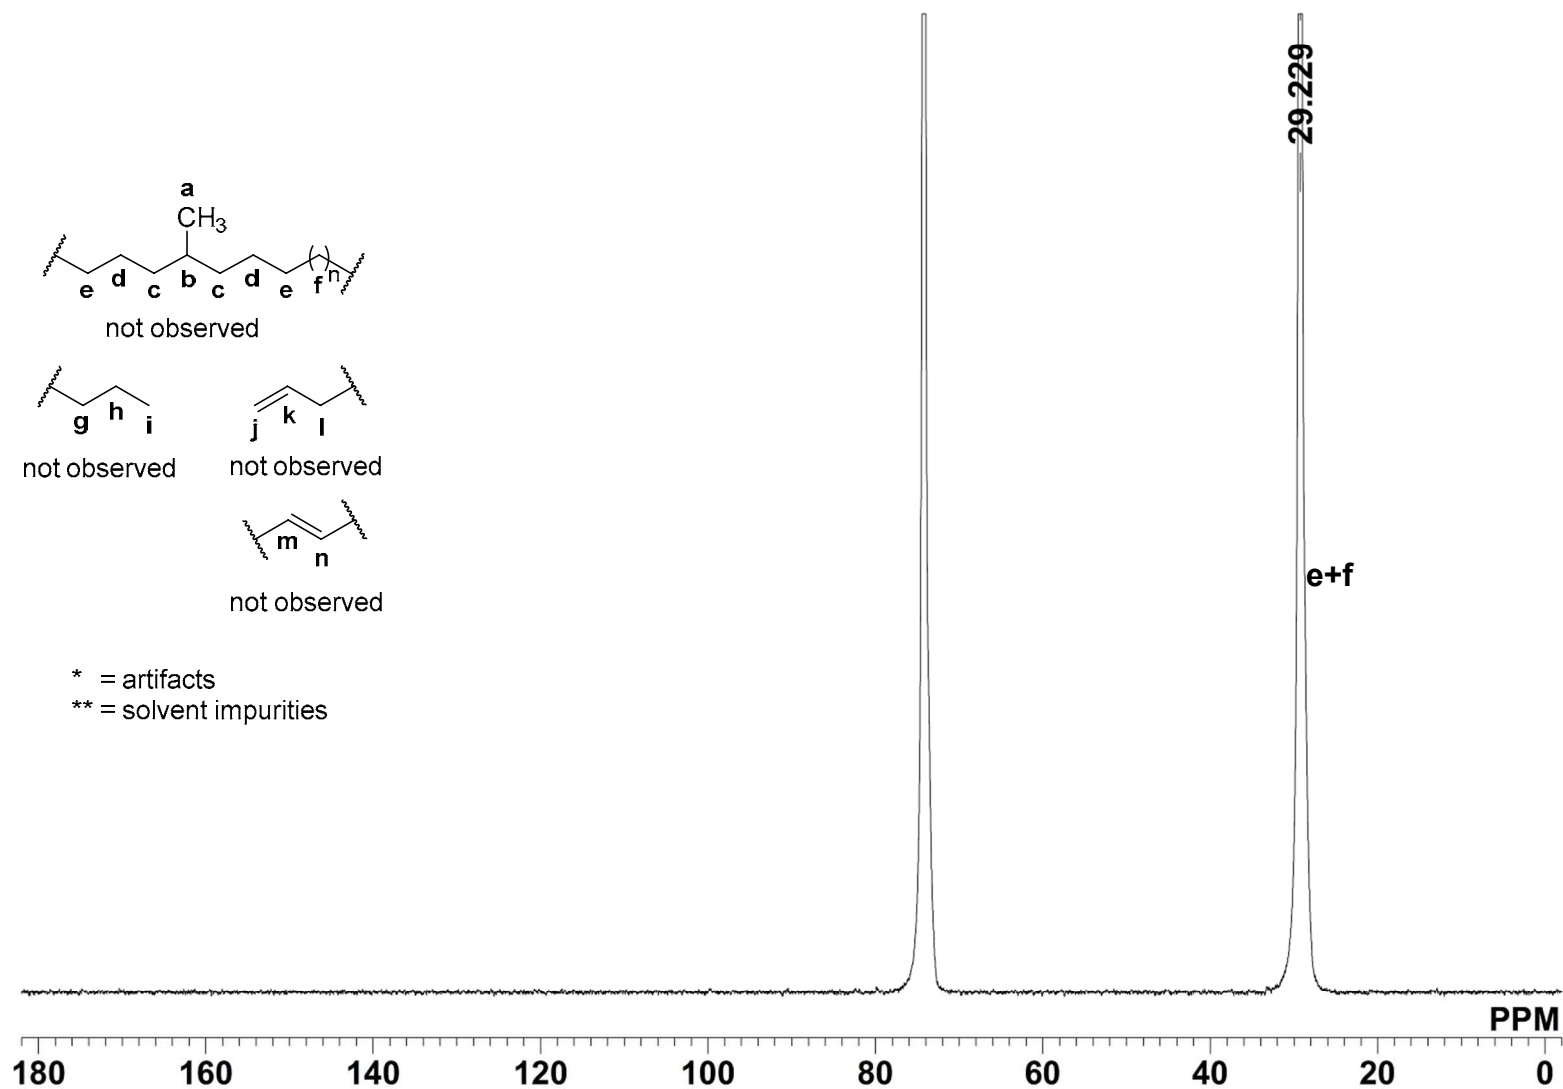

**Figure S9.** Quantitative  $^{13}\text{C}$  NMR spectrum (inverse gated decoupling, 126 MHz, 1,1,2,2-tetrachloroethane, 0.05-M Cr(acac)<sub>3</sub>, 120 °C) of polyethylene obtained by [2-(Men<sub>2</sub>P)C<sub>6</sub>H<sub>4</sub>SO<sub>3</sub>]PdMe(2,6-lutidine) under 1.0 MPa of ethylene pressure at 80 °C (Table 1, entry 11).

Sample name : 73-08-115  
 Database name : mike.mdb  
 Saved file name : RSLT0295  
 Method data : RSLT0291

Measurement date : 2014/06/26 04:44:23  
 Calculation date : 2014/06/26 14:11:52

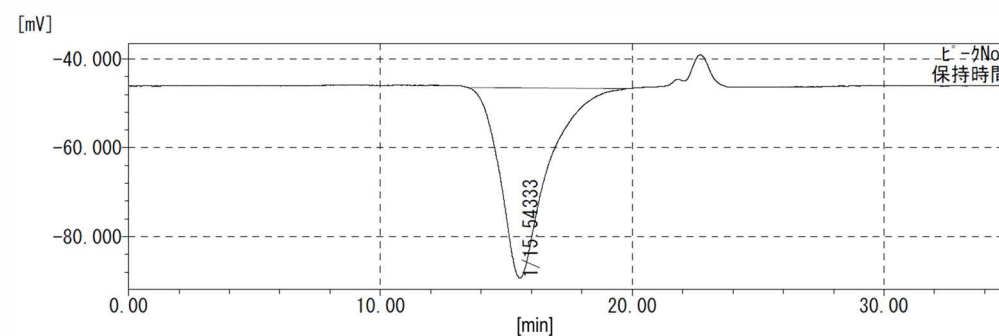

|                 | [min] | [mV]          | [MOL]     |
|-----------------|-------|---------------|-----------|
| Peak start      | 13.48 | -46.451       | 1,658,931 |
| Peak top        | 15.54 | -89.344       | 239,924   |
| Peak end        | 19.80 | -46.665       | 894       |
| Area [mV * sec] |       | 5,079.734     |           |
| Area [%]        |       | 100.000       |           |
| Height [mV]     |       | 42.823        |           |
| [ $\eta$ ]      |       | 248,852.00733 |           |

|         |   |         |
|---------|---|---------|
| Mn      | : | 67,827  |
| Mw      | : | 248,852 |
| Mz      | : | 428,648 |
| Mz+1    | : | 600,605 |
| Mv      | : | 248,852 |
| Mp      | : | 252,960 |
| Mz/Mw   | : | 1.723   |
| Mw/Mn   | : | 3.669   |
| Mz+1/Mw | : | 2.414   |

**Figure S10.** SEC chart of polyethylene obtained by  $[2-(\text{Men}_2\text{P})\text{C}_6\text{H}_4\text{SO}_3]\text{PdMe}(2,6\text{-lutidine})$  under 1.0 MPa of ethylene pressure at 80 °C (Table 1, entry 11).

$M_n$  (PS) = 67,800 was corrected to  $M_n$  (PE) = 29,000 by universal calibration.

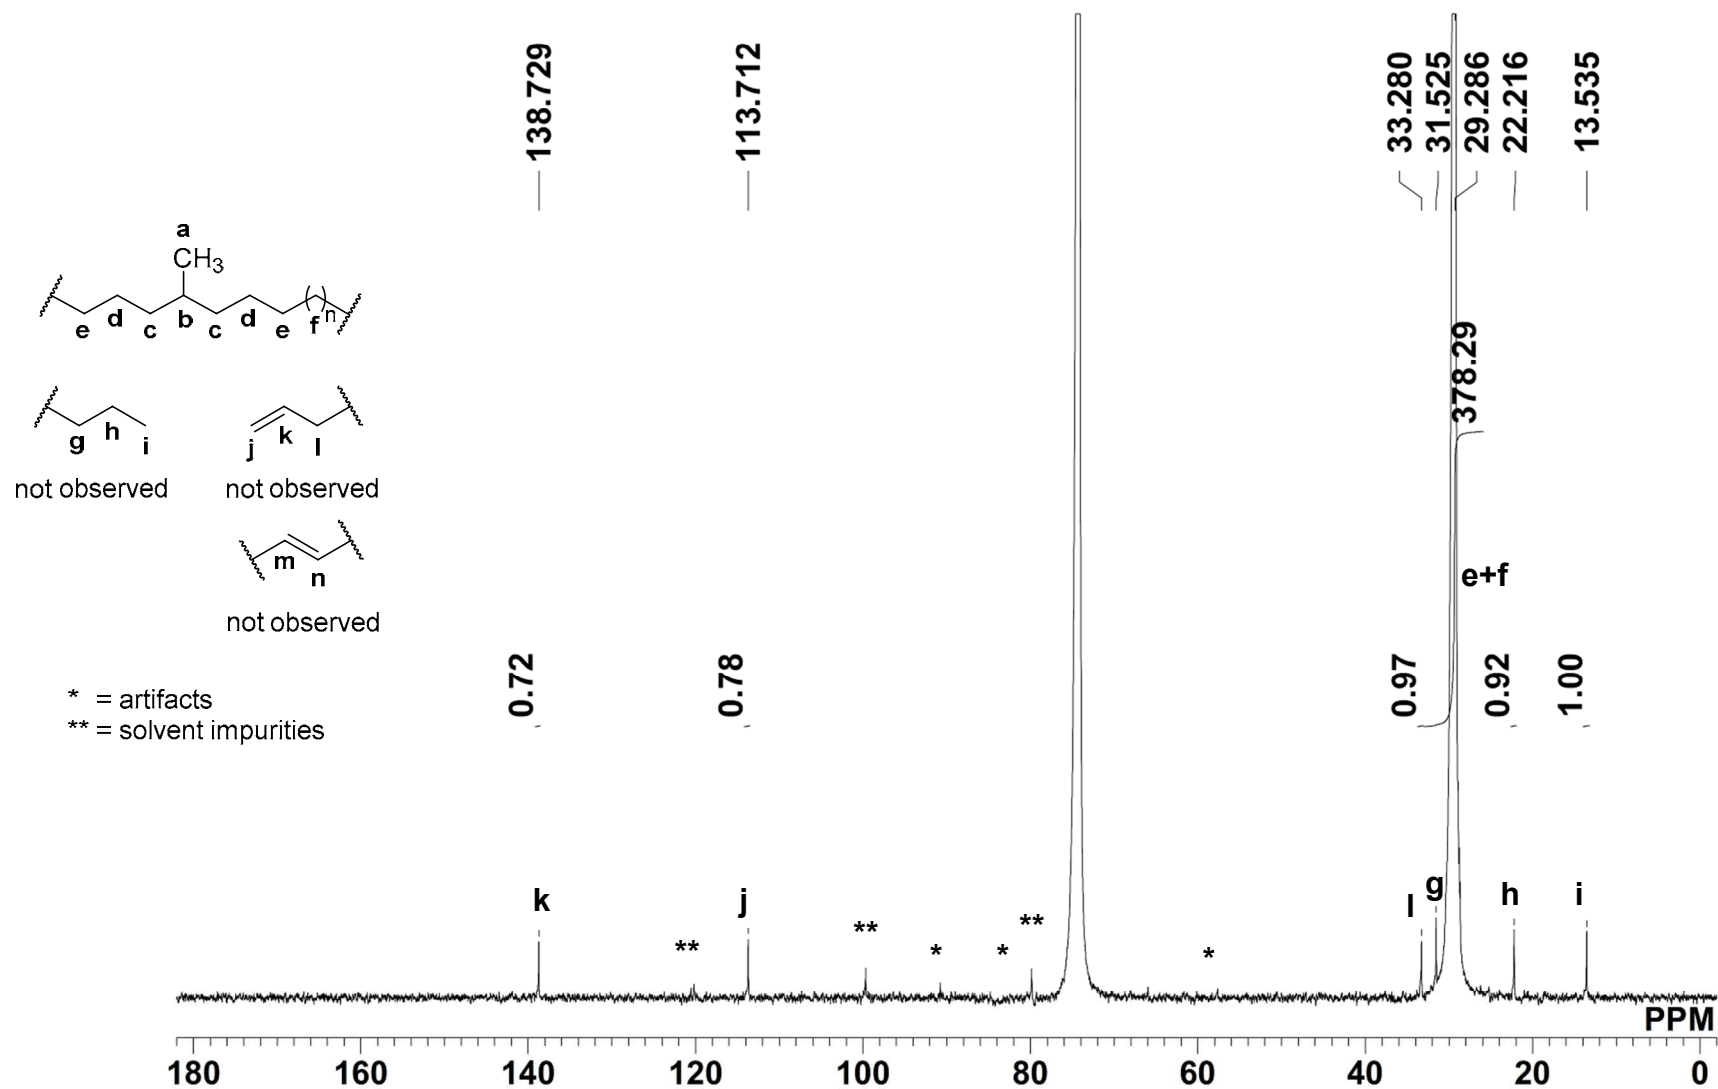

**Figure S11.** Quantitative  $^{13}\text{C}$  NMR spectrum (inverse gated decoupling, 126 MHz,  $1,1,2,2$ -tetrachloroethane,  $0.05\text{-M Cr(acac)}_3$ ,  $120^\circ\text{C}$ ) of polyethylene obtained by  $[2\text{-(Ph}_2\text{P)C}_6\text{H}_4\text{SO}_3]\text{PdMe(2,6-lutidine)}$  under  $3.0\text{ MPa}$  of ethylene pressure at  $80^\circ\text{C}$  (Table 1, entry 12).

Sample name : 73-09-070  
 Database name : mike.mdb  
 Saved file name : RSLT0669  
 Method data : 20150605

Measurement date : 2015/06/18 20:32:07  
 Calculation date : 2015/09/20 21:18:31

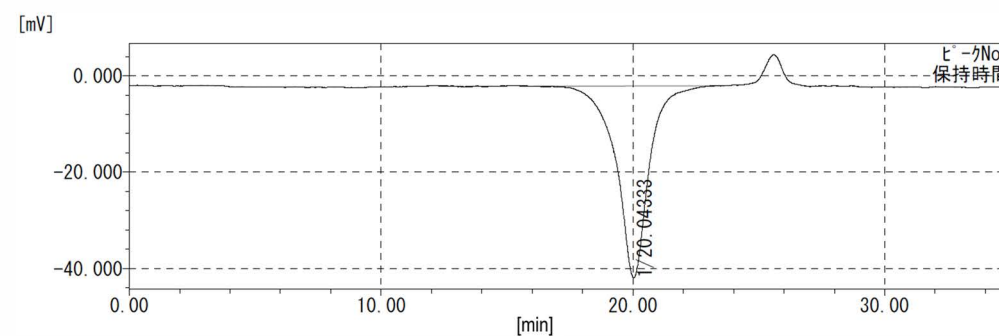

|                 | [min] | [mV]         | [MOL]   |
|-----------------|-------|--------------|---------|
| Peak start      | 16.08 | -2.175       | 551.385 |
| Peak top        | 20.04 | -41.933      | 16.103  |
| Peak end        | 23.65 | -2.089       | 122     |
| Area [mV * sec] |       | 3,296.214    |         |
| Area [%]        |       | 100.000      |         |
| Height [mV]     |       | 39.803       |         |
| [ $\eta$ ]      |       | 22,959.75092 |         |

|         |   |         |
|---------|---|---------|
| Mn      | : | 11,542  |
| Mw      | : | 22,960  |
| Mz      | : | 47,523  |
| Mz+1    | : | 119,397 |
| Mv      | : | 22,960  |
| Mp      | : | 16,631  |
| Mz/Mw   | : | 2.070   |
| Mw/Mn   | : | 1.989   |
| Mz+1/Mw | : | 5.200   |

**Figure S12.** SEC chart of polyethylene obtained by  $[2-(\text{Ph}_2\text{P})\text{C}_6\text{H}_4\text{SO}_3]\text{PdMe}(2,6\text{-lutidine})$  under 3.0 MPa of ethylene pressure at 80 °C (Table 1, entry 12).

$M_n$  (PS) = 11,500 was corrected to  $M_n$  (PE) = 5,000 by universal calibration.

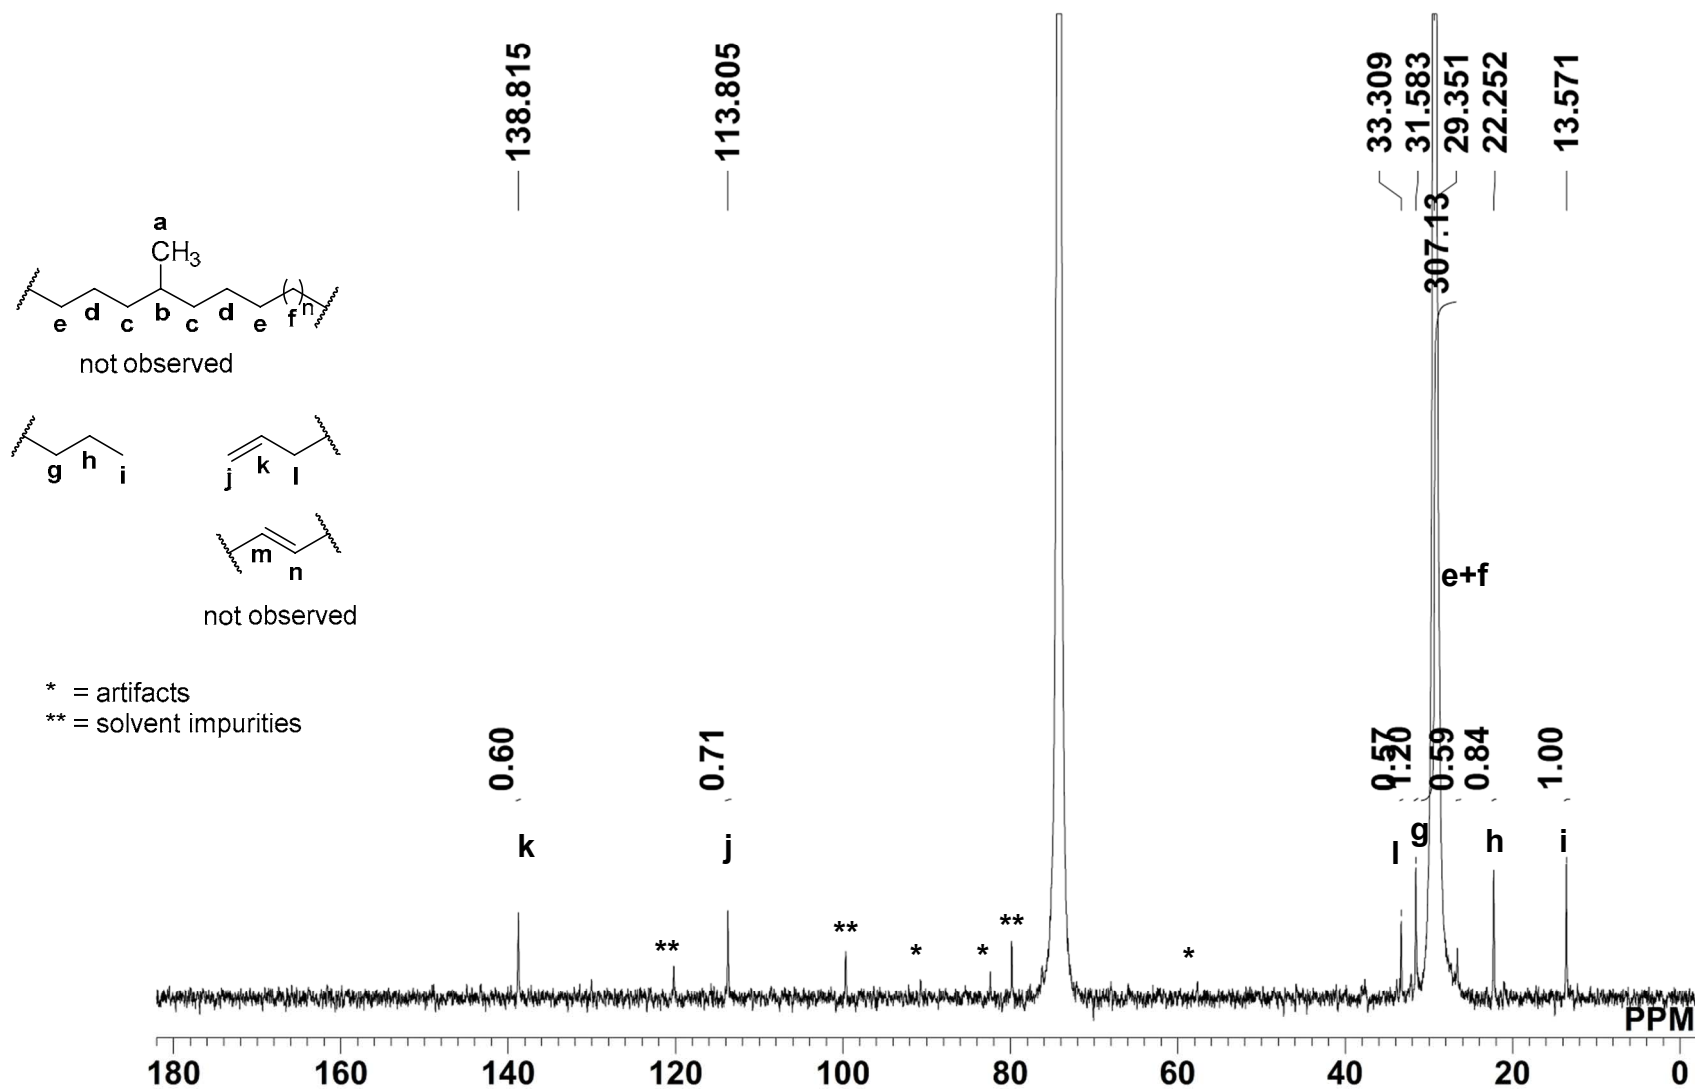

**Figure S13.** Quantitative  $^{13}\text{C}$  NMR spectrum (inverse gated decoupling, 126 MHz,  $1,1,2,2$ -tetrachloroethane,  $0.05\text{-M Cr}(\text{acac})_3$ ,  $120^\circ\text{C}$ ) of polyethylene obtained by  $[2\text{-(Ph}_2\text{P)C}_6\text{H}_4\text{SO}_3]\text{PdMe(2,6-lutidine)}$  under  $1.0\text{ MPa}$  of ethylene pressure at  $80^\circ\text{C}$  (Table 1, entry 13).



Sample name : 73-09-071  
 Database name : mike.mdb  
 Saved file name : RSLT0667  
 Method data : 20150605

Measurement date : 2015/06/18 18:22:07  
 Calculation date : 2015/06/18 20:29:19

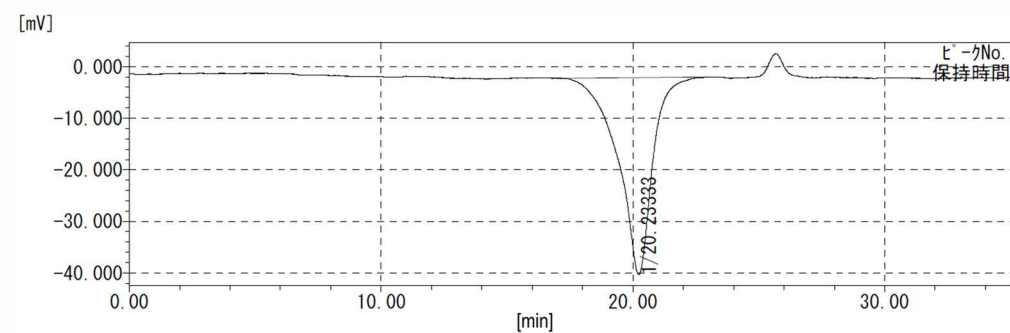

|                 | [min] | [mV]         | [MOL]   |
|-----------------|-------|--------------|---------|
| Peak start      | 16.79 | -2.238       | 315.977 |
| Peak top        | 20.23 | -40.297      | 13.098  |
| Peak end        | 23.06 | -1.993       | 319     |
| Area [mV * sec] |       | 3.261.705    |         |
| Area [%]        |       | 100.000      |         |
| Height [mV]     |       | 38.194       |         |
| [η]             |       | 21,790.41028 |         |

|         |   |        |
|---------|---|--------|
| Mn      | : | 11,742 |
| Mw      | : | 21,790 |
| Mz      | : | 41,310 |
| Mz+1    | : | 72,385 |
| Mv      | : | 21,790 |
| Mp      | : | 13,243 |
| Mz/Mw   | : | 1.896  |
| Mw/Mn   | : | 1.856  |
| Mz+1/Mw | : | 3.322  |

**Figure S14.** SEC chart of polyethylene obtained by  $[2-(\text{Ph}_2\text{P})\text{C}_6\text{H}_4\text{SO}_3]\text{PdMe}(2,6\text{-lutidine})$  under 1.0 MPa of ethylene pressure at 80 °C (Table 1, entry 13).

$M_n$  (PS) = 11,700 was corrected to  $M_n$  (PE) = 5,100 by universal calibration.

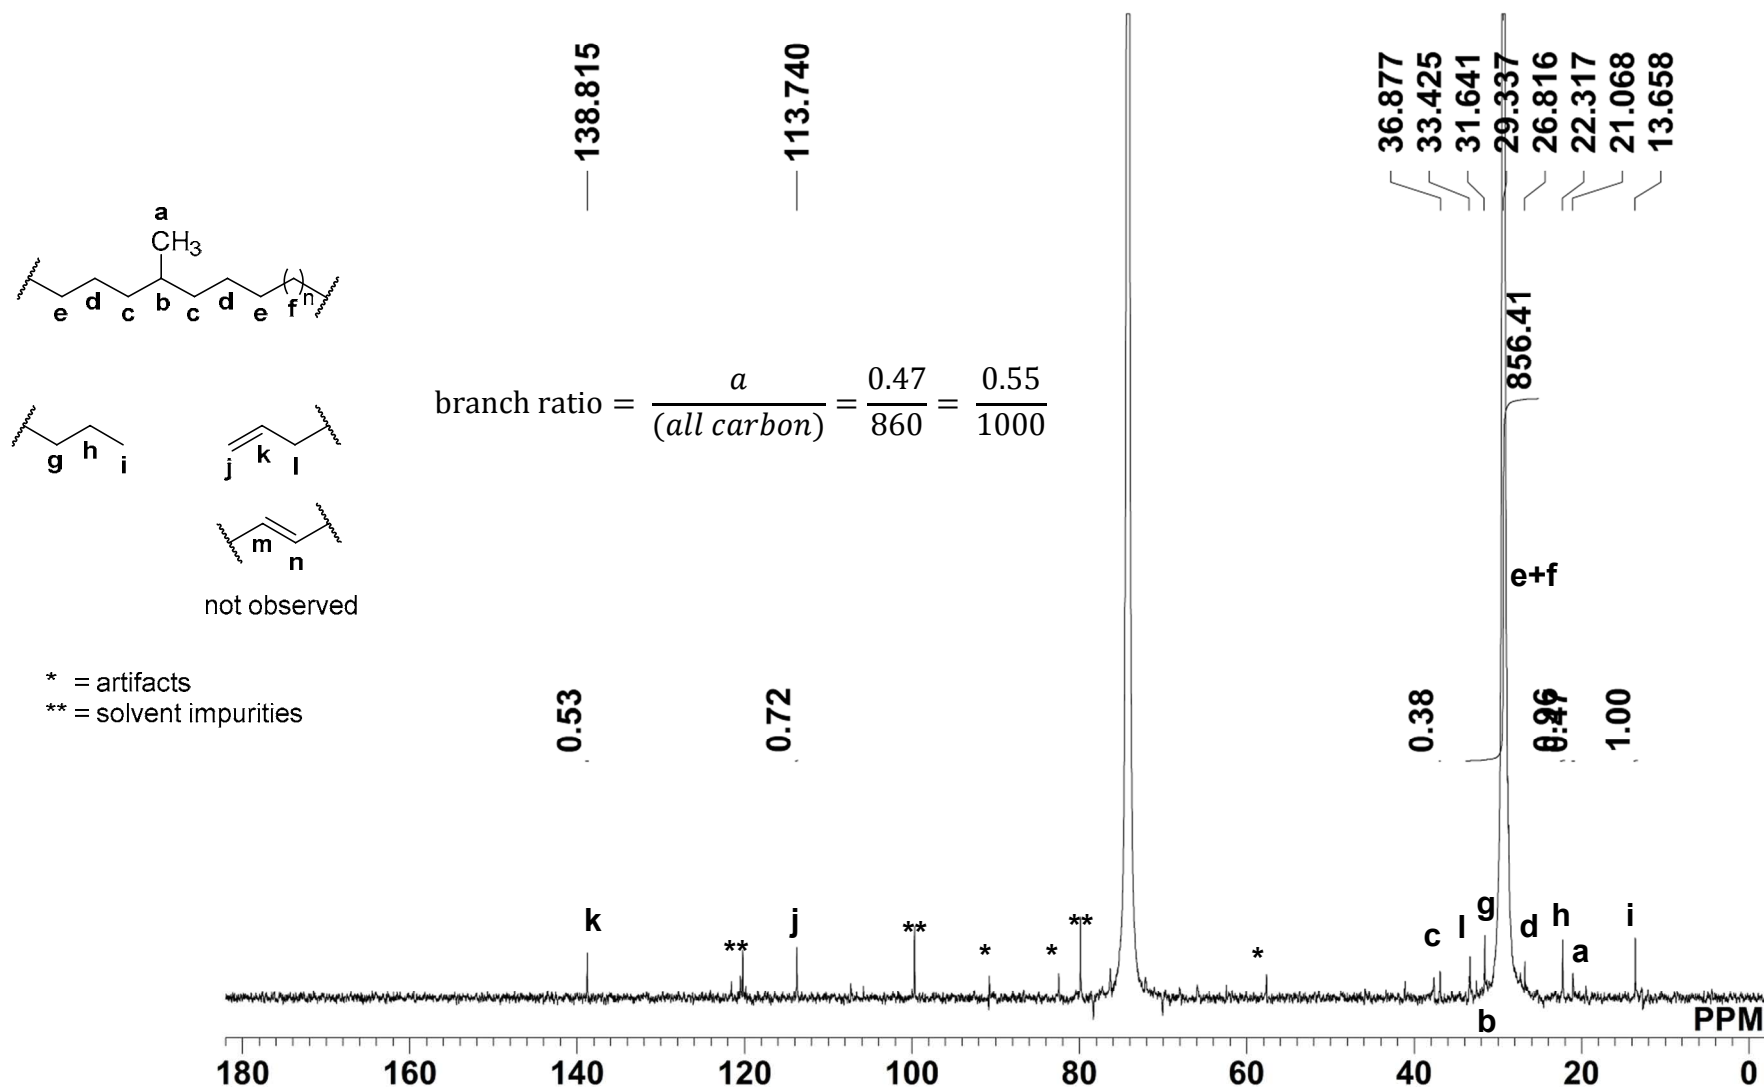

**Figure S15.** Quantitative  $^{13}\text{C}$  NMR spectrum (inverse gated decoupling, 126 MHz, 1,1,2,2-tetrachloroethane, 0.05-M  $\text{Cr}(\text{acac})_3$ , 120  $^\circ\text{C}$ ) of polyethylene obtained by  $[2-(o\text{-Ani}_2\text{P})\text{C}_6\text{H}_4\text{SO}_3]\text{PdMe}(2,6\text{-lutidine})$  under 3.0 MPa of ethylene pressure at 80  $^\circ\text{C}$  (Table 1, entry 16).

Sample name : 73-08-109  
 Database name : mike.mdb  
 Saved file name : RSLT0290  
 Method data : RSLT0291

Measurement date : 2014/06/26 00:59:16  
 Calculation date : 2014/06/26 10:04:33

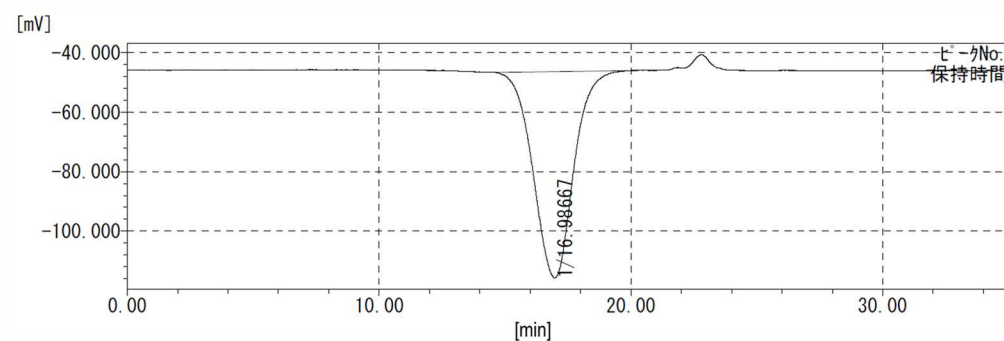

|                 | [min] | [mV]         | [MOL]   |
|-----------------|-------|--------------|---------|
| Peak start      | 14.66 | -46.703      | 584.364 |
| Peak top        | 16.99 | -115.740     | 45.796  |
| Peak end        | 19.86 | -46.054      | 814     |
| Area [mV * sec] |       | 7,040.892    |         |
| Area [%]        |       | 100.000      |         |
| Height [mV]     |       | 69.327       |         |
| [ $\eta$ ]      |       | 66,073.89301 |         |

|         |   |         |
|---------|---|---------|
| Mn      | : | 31,561  |
| Mw      | : | 66,074  |
| Mz      | : | 116,336 |
| Mz+1    | : | 179,984 |
| Mv      | : | 66,074  |
| Mp      | : | 48,702  |
| Mz/Mw   | : | 1.761   |
| Mw/Mn   | : | 2.094   |
| Mz+1/Mw | : | 2.724   |

**Figure S16.** SEC chart of polyethylene obtained by  $[2-(o\text{-Ani}_2\text{P})\text{C}_6\text{H}_4\text{SO}_3]\text{PdMe}(2,6\text{-lutidine})$  under 3.0 MPa of ethylene pressure at 80 °C (Table 1, entry 16).

$M_n$  (PS) = 31,600 was corrected to  $M_n$  (PE) = 14,000 by universal calibration.

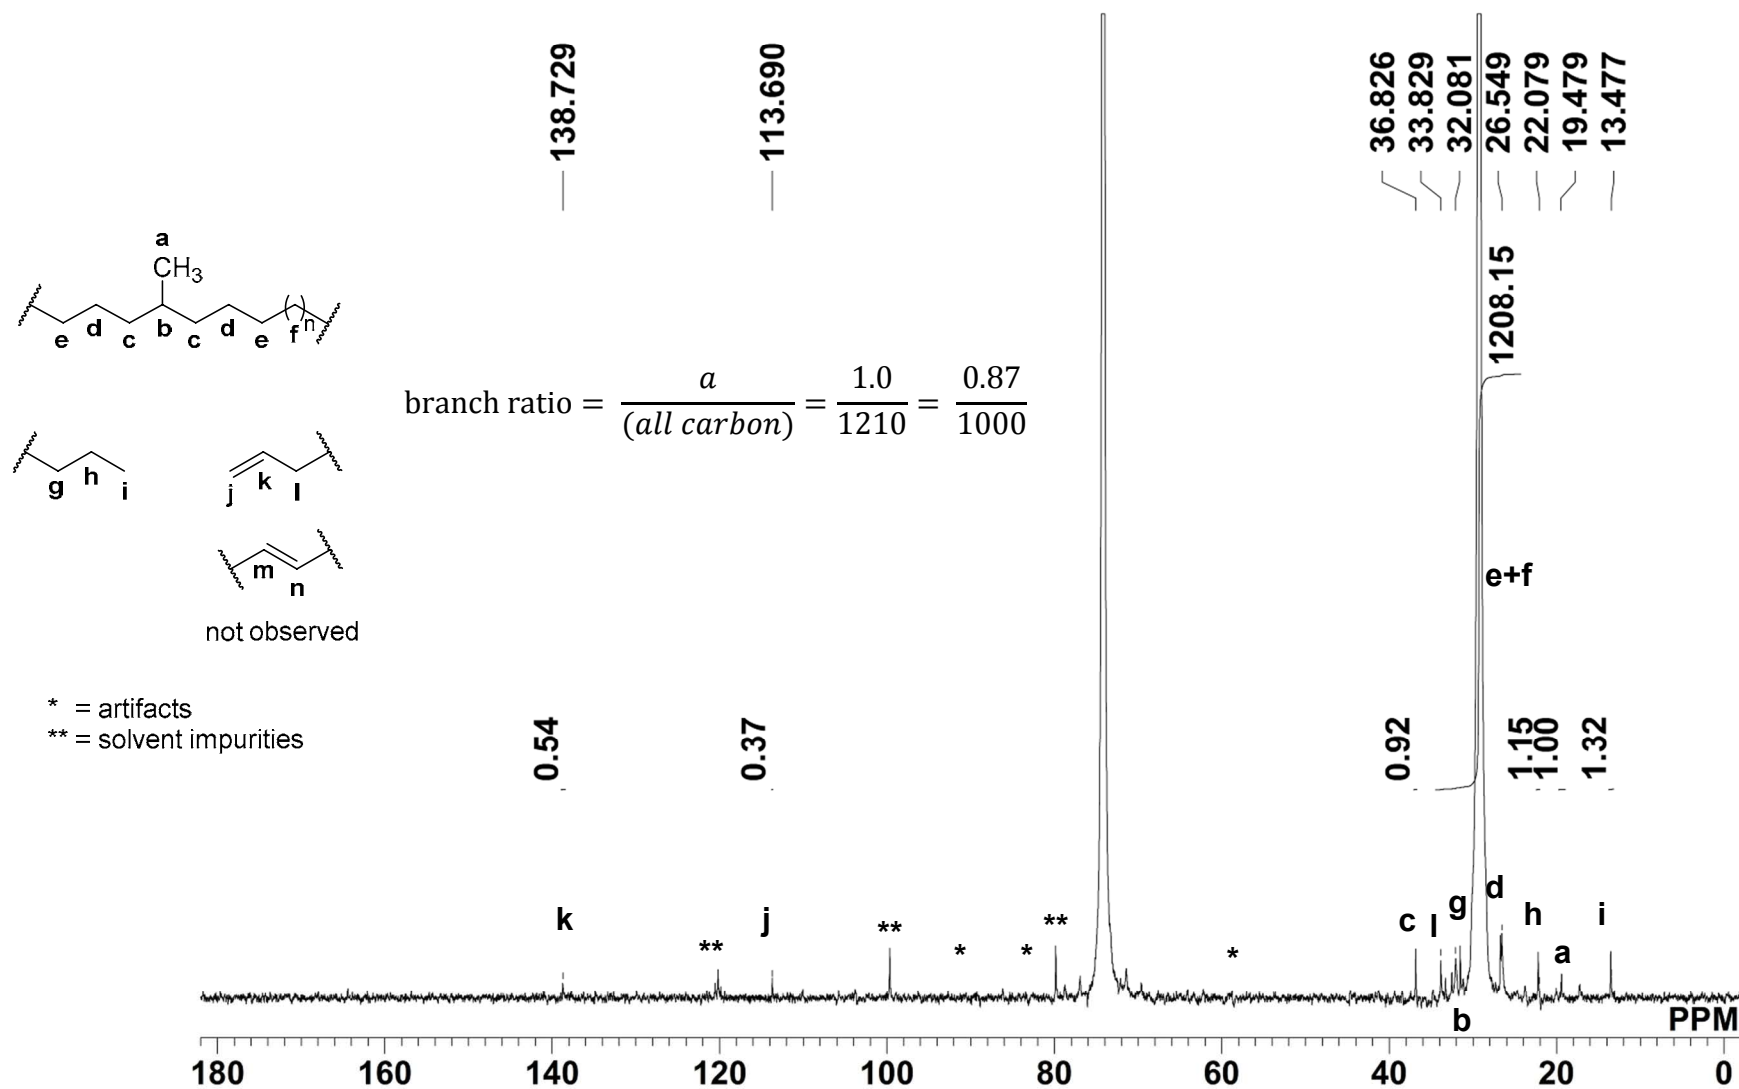

**Figure S17.** Quantitative  $^{13}\text{C}$  NMR spectrum (inverse gated decoupling, 126 MHz, 1,1,2,2-tetrachloroethane, 0.05-M  $\text{Cr}(\text{acac})_3$ , 120  $^\circ\text{C}$ ) of polyethylene obtained by  $[2\text{-(}o\text{-Ani}_2\text{P)C}_6\text{H}_4\text{SO}_3]\text{PdMe(2,6-lutidine)}$  under 1.0 MPa of ethylene pressure at 80  $^\circ\text{C}$  (Table 1, entry 17).

Sample name : 73-08-110  
 Database name : mike.mdb  
 Saved file name : RSLT0291  
 Method data : RSLT0291

Measurement date : 2014/06/26 01:44:20  
 Calculation date : 2014/06/26 10:05:34

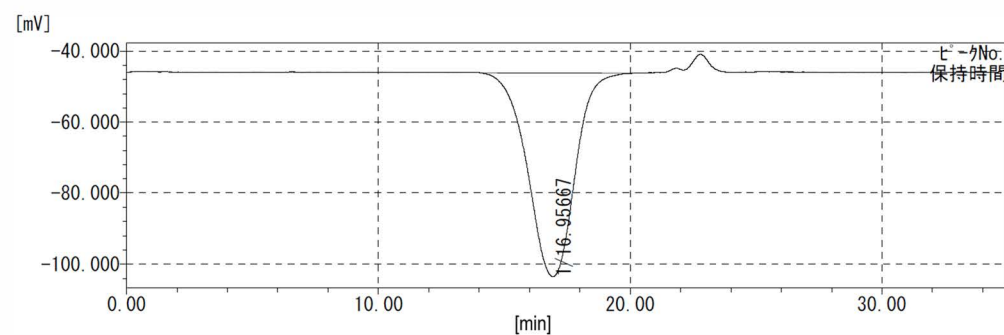

|                 | [min] | [mV]         | [MOL]     |         |           |
|-----------------|-------|--------------|-----------|---------|-----------|
| Peak start      | 14.01 | -46.135      | 1,058,858 | Mn      | : 30,965  |
| Peak top        | 16.96 | -103.530     | 47,520    | Mw      | : 80,162  |
| Peak end        | 20.10 | -46.218      | 560       | Mz      | : 171,679 |
|                 |       |              |           | Mz+1    | : 300,839 |
| Area [mV * sec] |       | 6,821.167    |           | Mv      | : 80,162  |
| Area [%]        |       | 100.000      |           | Mp      | : 53,924  |
| Height [mV]     |       | 57.355       |           | Mz/Mw   | : 2.142   |
| [η]             |       | 80,162.49861 |           | Mw/Mn   | : 2.589   |
|                 |       |              |           | Mz+1/Mw | : 3.753   |

**Figure S18.** SEC chart of polyethylene obtained by  $[2-(o\text{-Ani}_2\text{P})\text{C}_6\text{H}_4\text{SO}_3]\text{PdMe}(2,6\text{-lutidine})$  under 1.0 MPa of ethylene pressure at 80 °C (Table 1, entry 17).

$M_n$  (PS) = 30,000 was corrected to  $M_n$  (PE) = 13,000 by universal calibration.

### III. NMR Spectra from H/D Exchange Experiments

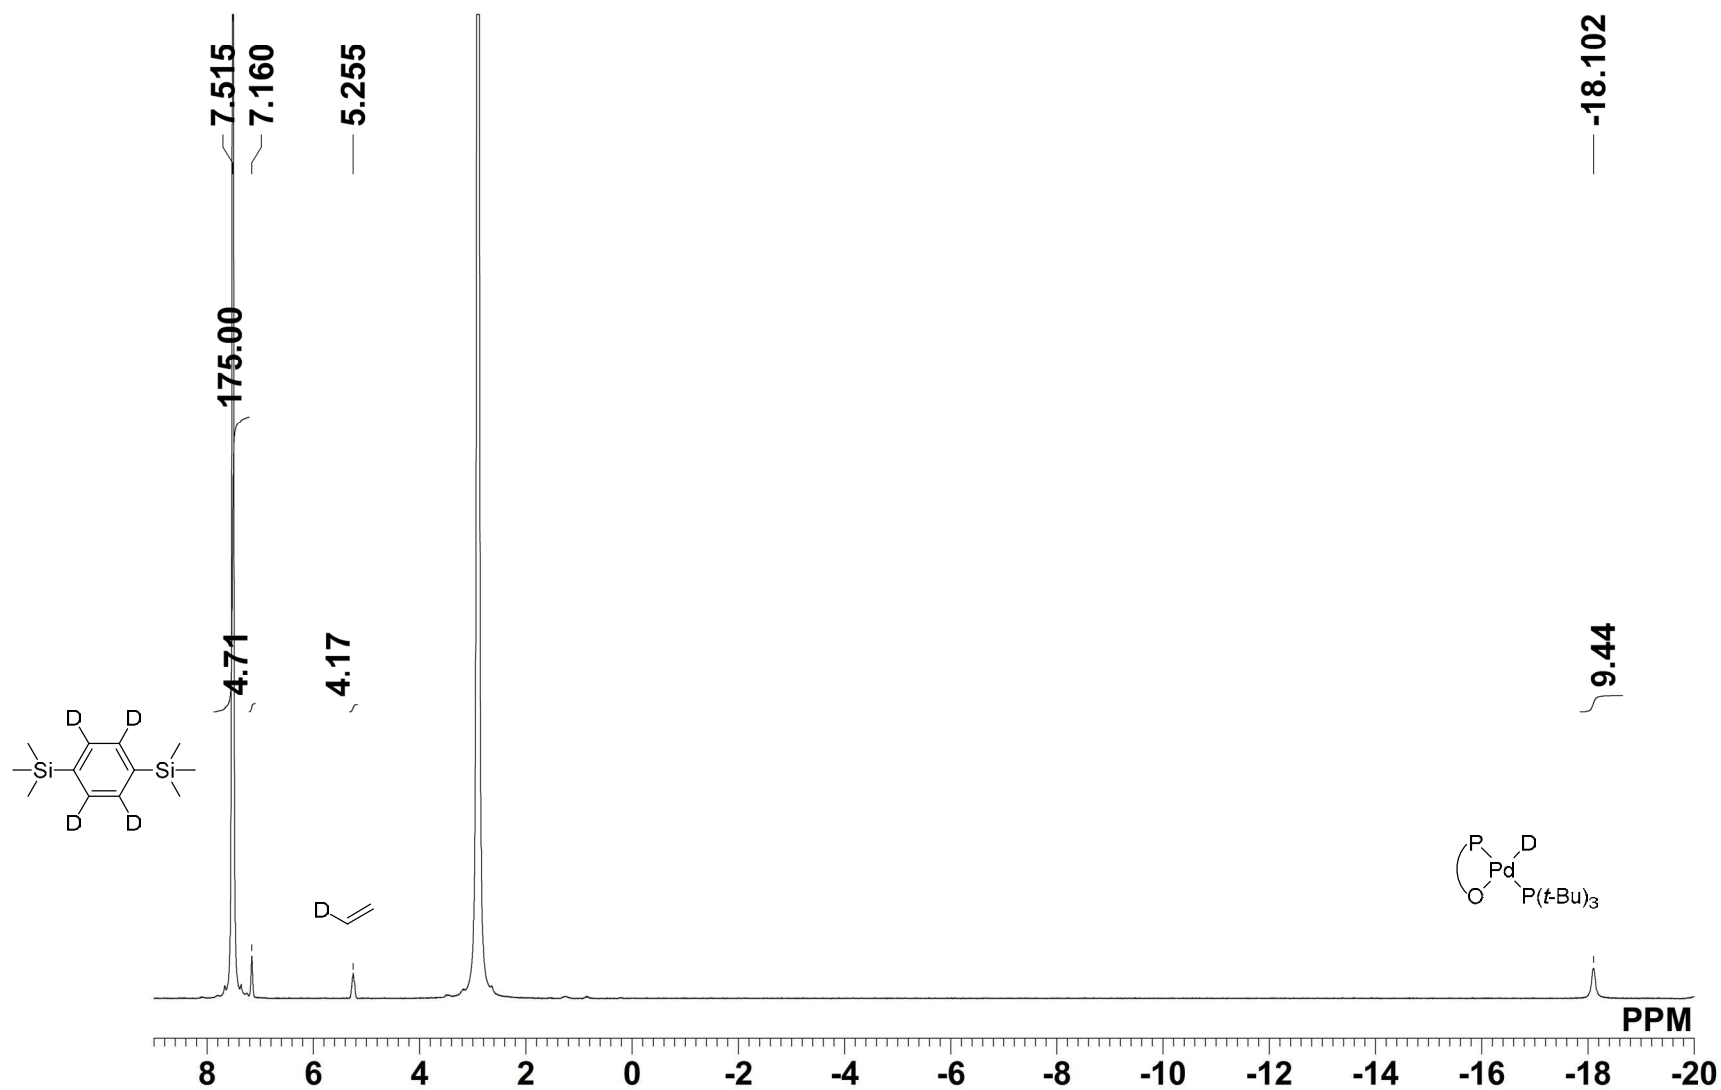

Figure S19.  $^2\text{H}$  NMR spectrum (77 MHz, benzene, 25 °C) of the reaction mixture after deuteration of ethylene (Scheme 4).

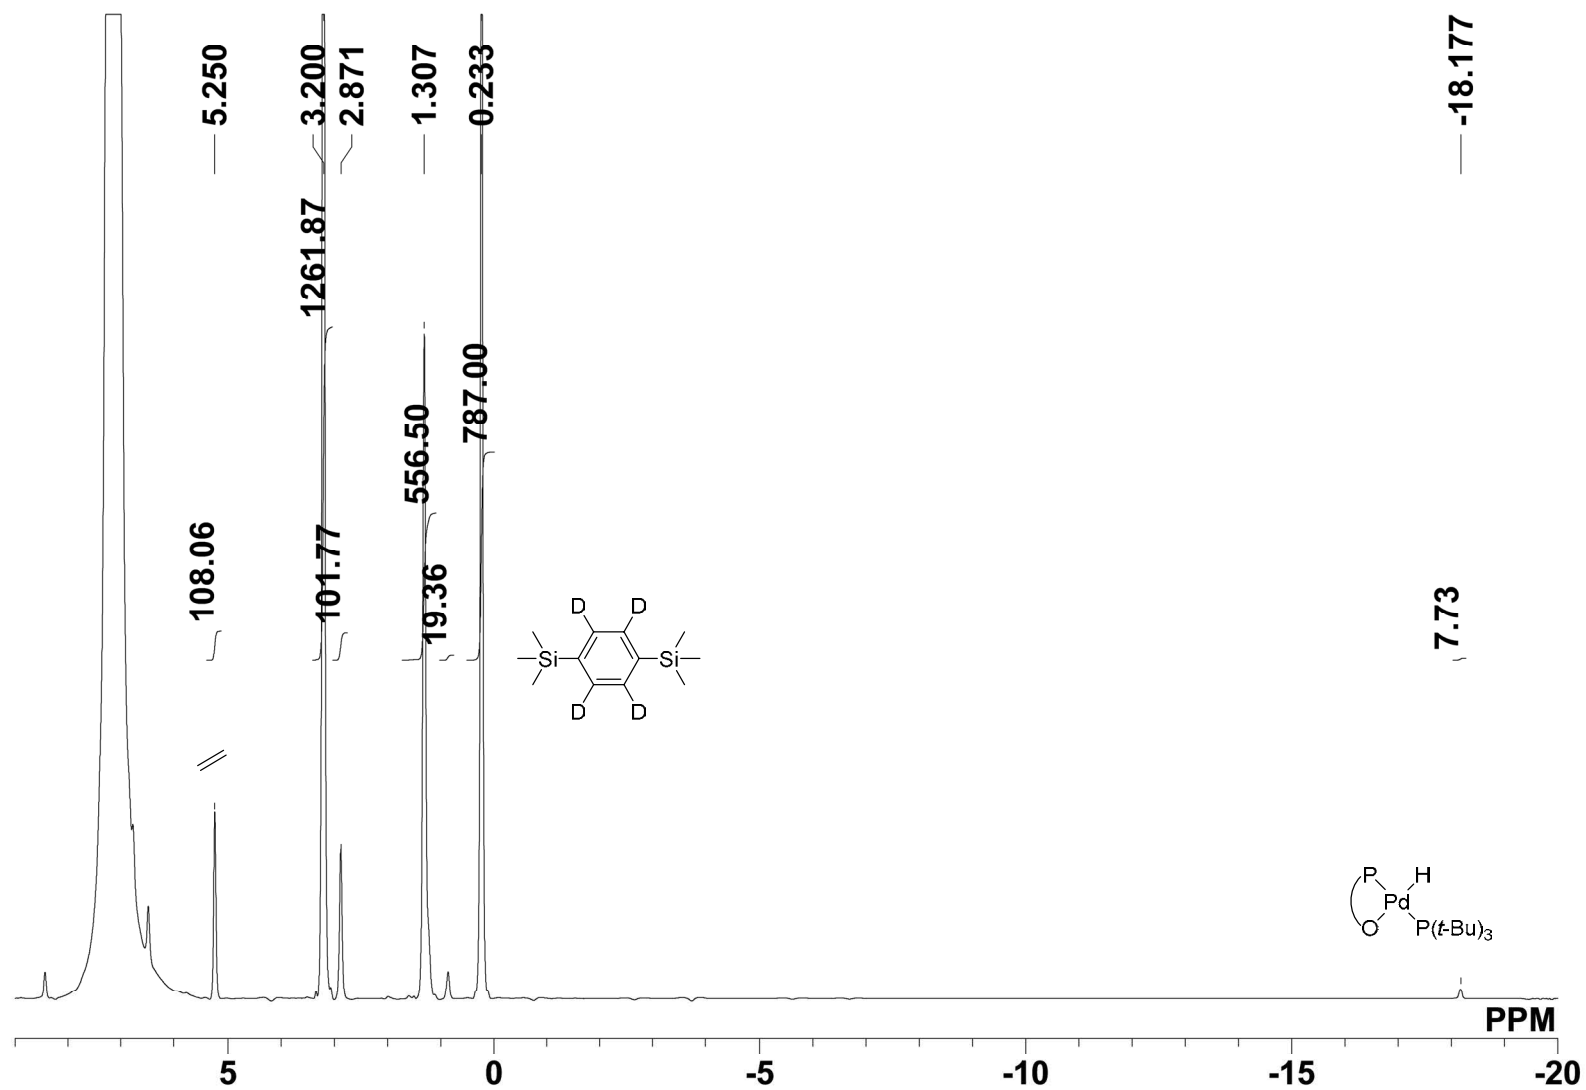

**Figure S20.**  $^1\text{H}$  NMR spectrum (500 MHz, benzene, 25 °C) of the reaction mixture after deuteration of ethylene (Scheme 4).

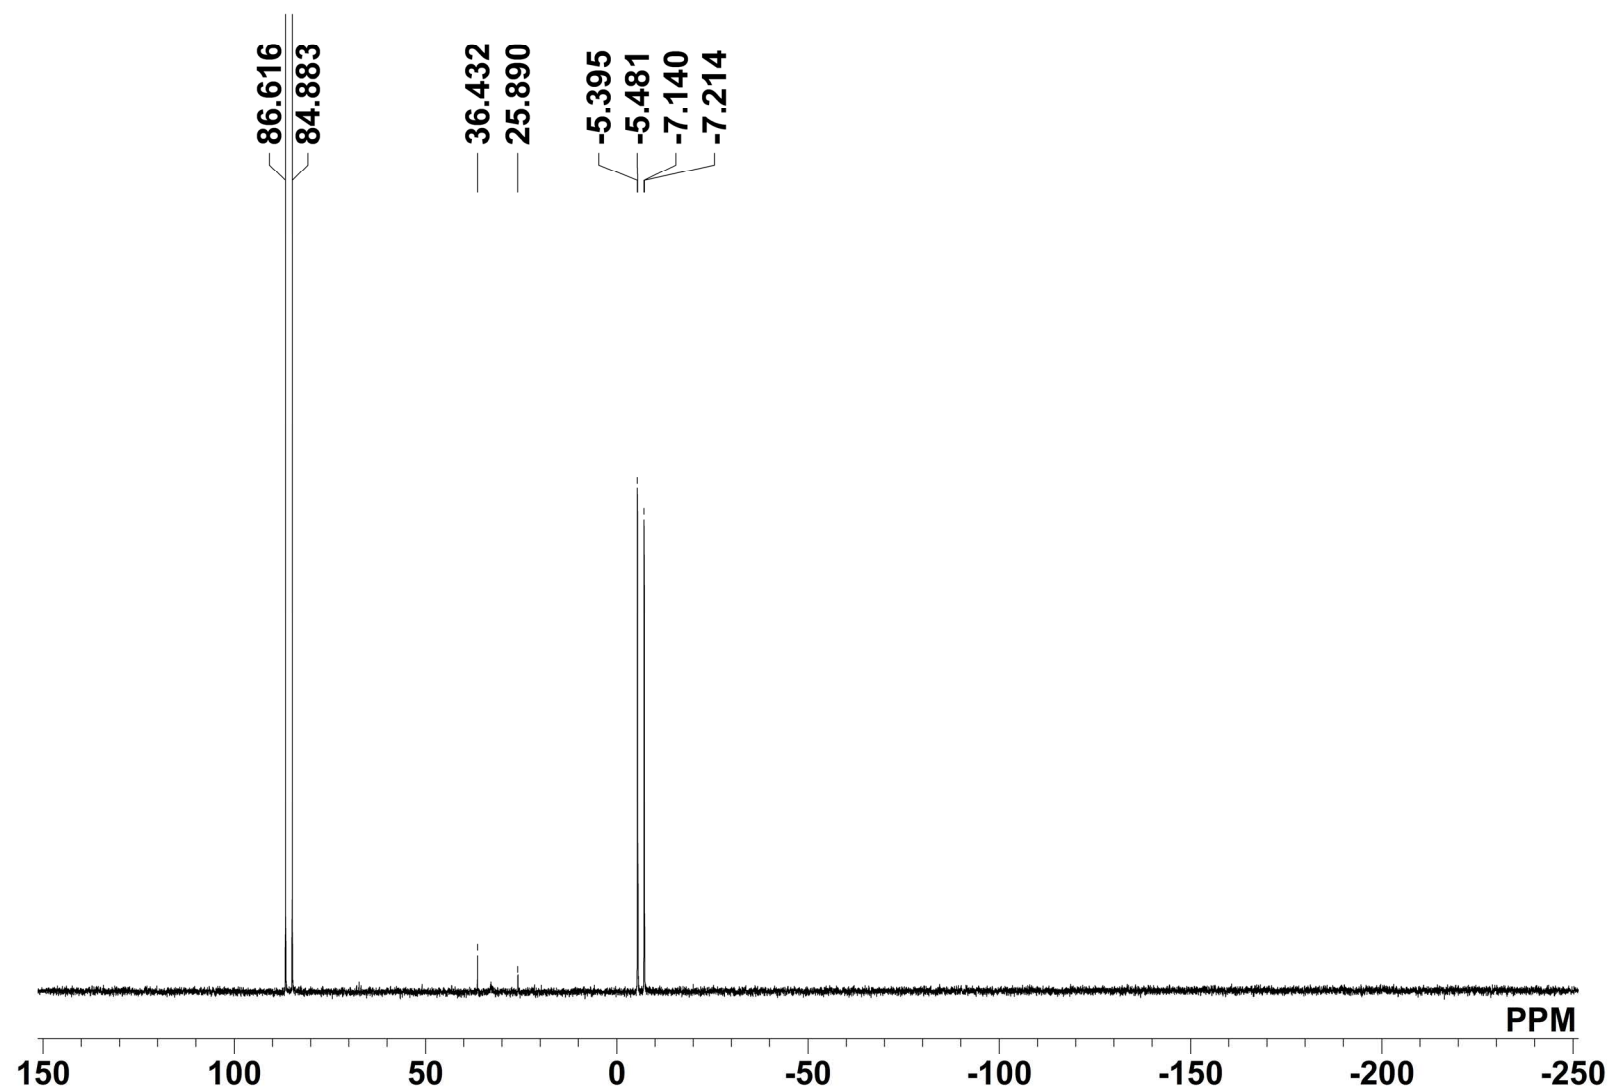

**Figure S21.**  $^{31}\text{P}$  NMR spectrum (202 MHz, benzene, 25 °C) of the reaction mixture after deuteration of ethylene (Scheme 4).



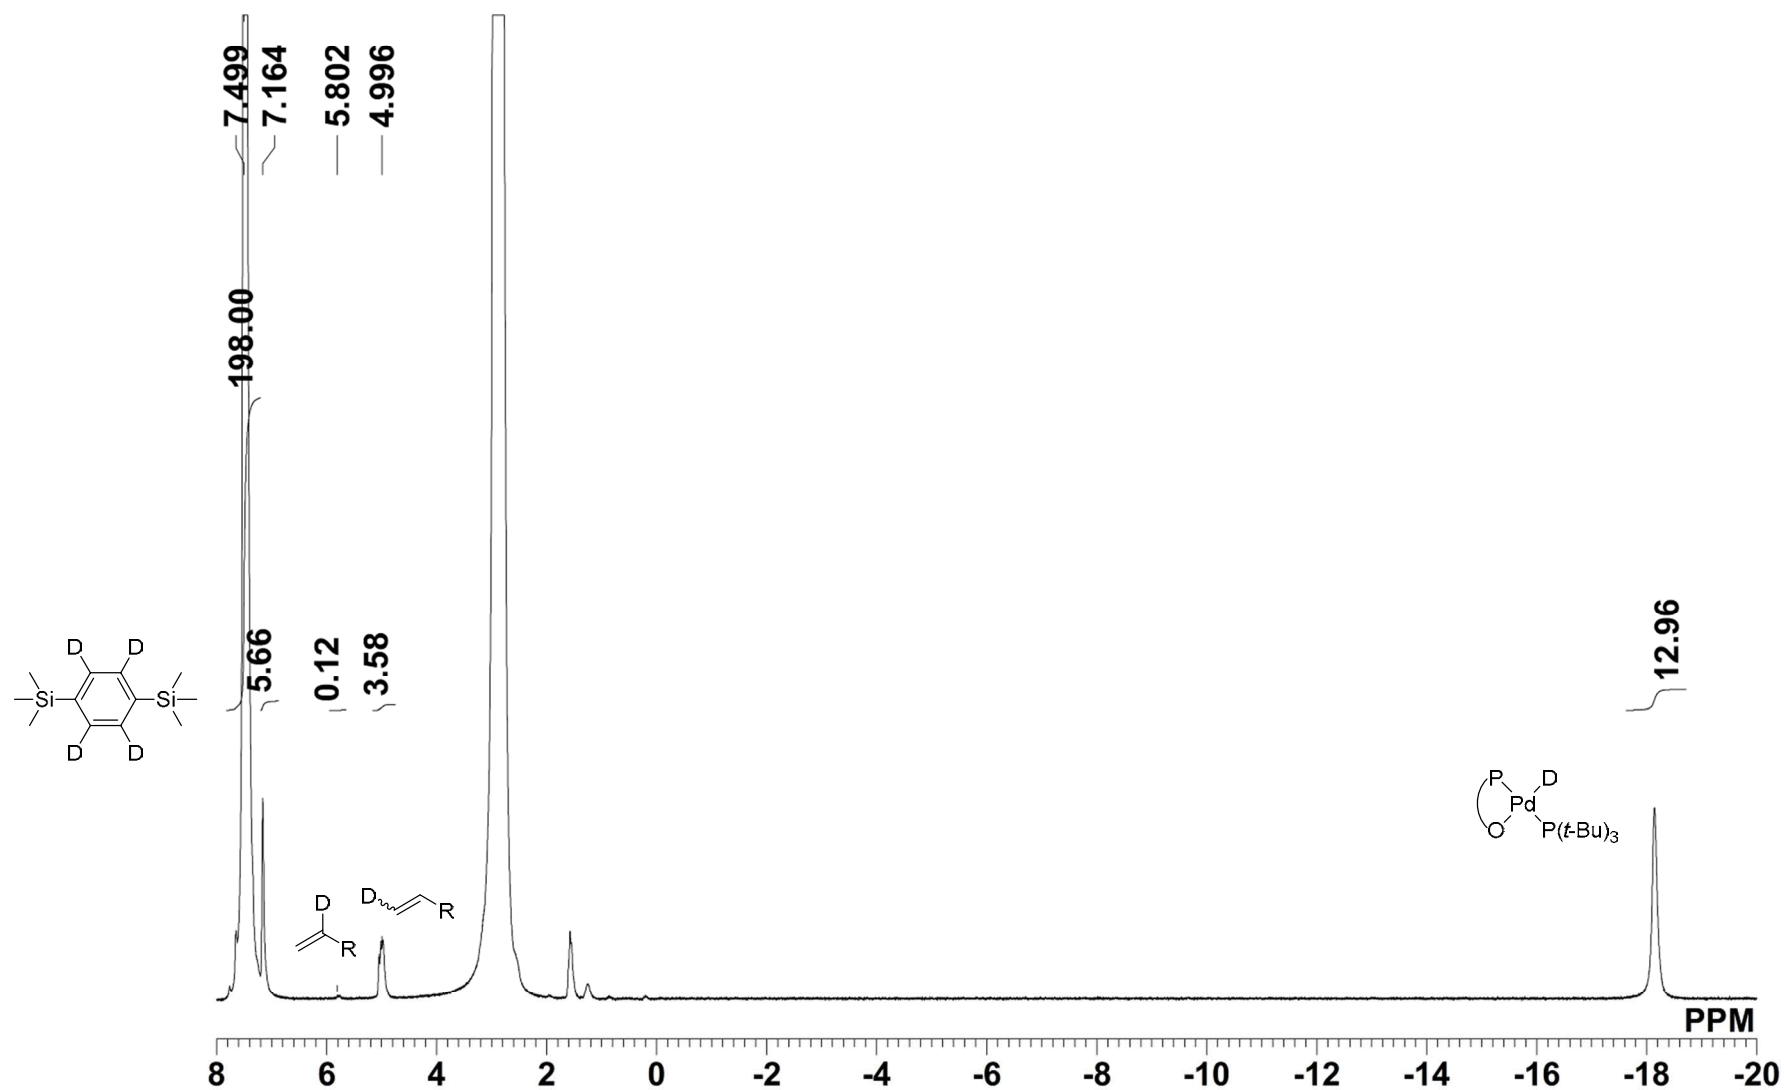

Figure S22.  $^{31}\text{P}$  NMR spectrum (77 MHz, benzene, 25 °C) of the reaction mixture after deuteration of 1-eicocene (Scheme 6).

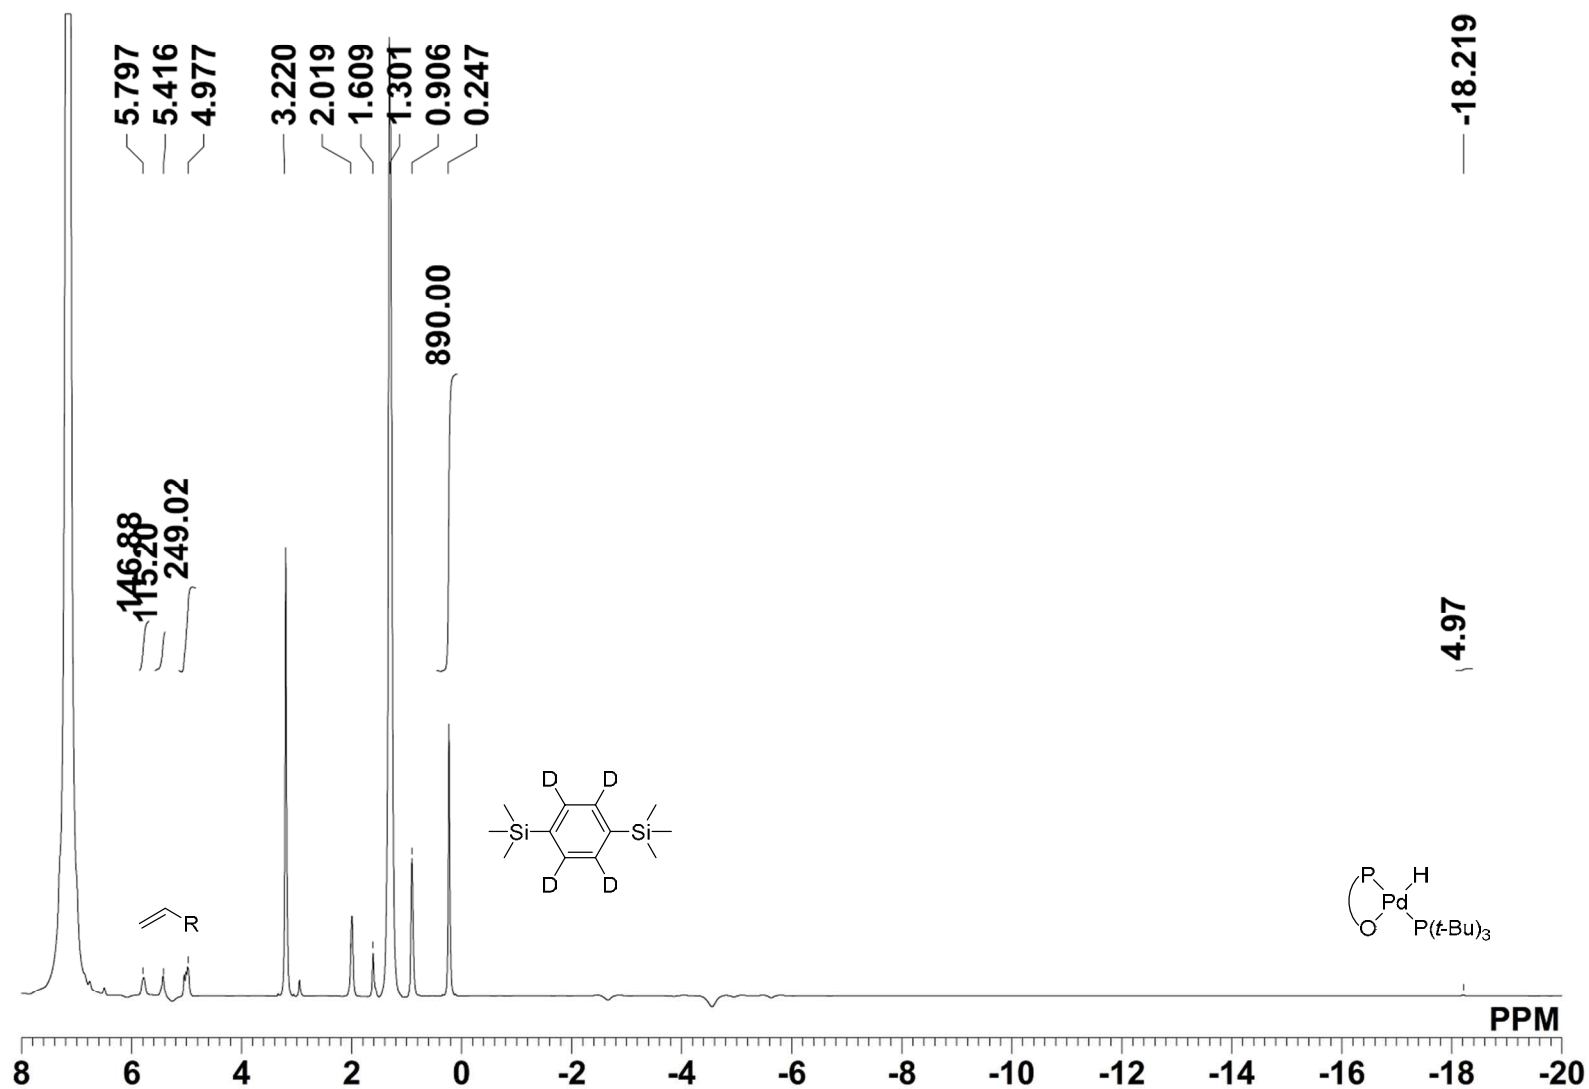

**Figure S23.**  $^1\text{H}$  NMR spectrum (500 MHz, benzene, 25 °C) of the reaction mixture after deuteration of 1-eicocene (Scheme 6).

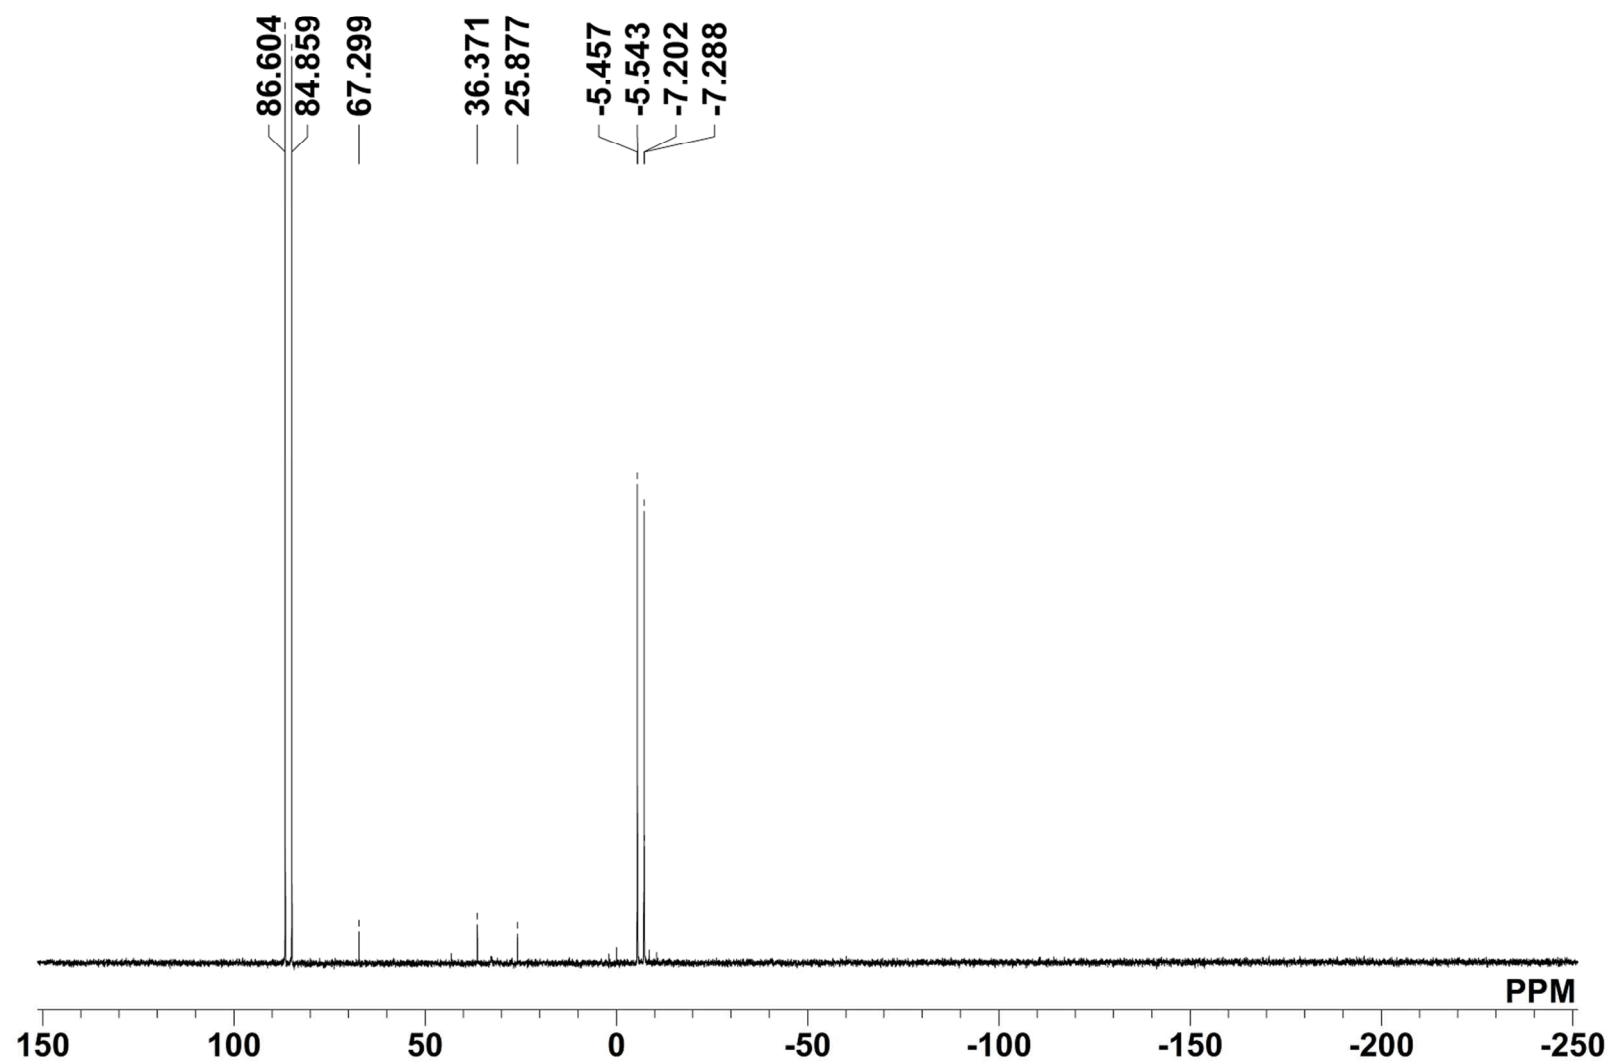

**Figure S24.**  $^{31}\text{P}$  NMR spectrum (202 MHz, benzene, 25 °C) of the reaction mixture after deuteration of 1-eicocene (Scheme 6).

### III. References

- (1) Guan, Z.; Cotts, P. M.; McCord, E. F.; McLain, S. J. *Science* **1999**, 283, 2059–2062.
- (2) Cotts, P. M.; Guan, Z.; McCord, E.; McLain, S. *Macromolecules* **2000**, 33, 6945–6952.
- (3) Randall, J. C.; Ruff, C. J.; Kelchtermans, M.; Gregory, B. H. *Macromolecules* **1992**, 25, 2624–2633.
- (4) Grinshpun, V.; Rudin, A. *Makromol. Chem., Rapid Commun.* **1985**, 6, 219–223.
- (5) Pangborn, A. B.; Giardello, M. A.; Grubbs, R. H.; Rosen, R. K.; Timmers, F. J. *Organometallics*, **1996**, 15, 1518–1520.
- (6) Ota, Y.; Ito, S.; Kuroda, J.; Okumura, Y.; Nozaki, K. *J. Am. Chem. Soc.* **2014**, 136, 11898–11901.
- (7) Nozaki, K.; Ito, S.; Okumura, Y.; Kuroda, J. PCT Int. Pat. WO2011025053, 2011.
- (8) Ito, S.; Munakata, K.; Nakamura, A.; Nozaki, K. *J. Am. Chem. Soc.* **2009**, 131, 14606–14607.
- (9) Piche, L.; Daigle, J.-C.; Rehse, G.; Claverie, J. P. *Chem. Eur. J.* **2012**, 18, 3277–3285.
- (10) Kochi, T.; Noda, S.; Yoshimura, K.; Nozaki, K. *J. Am. Chem. Soc.* **2007**, 129, 8948–8949.
- (11) Rünzi, T.; Tritschler, U.; Roesle, P.; Göttker-Schnetmann, I.; Möller, H. M.; Caporaso, L.; Poater, A.; Cavallo, L.; Mecking, S. *Organometallics* **2012**, 31, 8388–8406.
